# Supplementary material for: Pressure-induced annulative orifice closure of a cage-opened C60 derivative
Source: Royal Society of Chemistry journal article supplement (doi:10.1039/d1cc01662h), 2021-01-01
Supplement: d1cc01662h1.pdf [file d1cc01662h1.pdf]

**Supporting Information**

**Pressure-Induced Annulative Orifice Closure  
of a Cage-Opened C<sub>60</sub> Derivative**

Yoshifumi Hashikawa, Kazuro Kizaki, and Yasujiro Murata\*

*Institute for Chemical Research, Kyoto University, Uji, Kyoto 611-0011, Japan*

*Fax: (+81)774-38-3178*

*E-mail: yasujiro@scl.kyoto-u.ac.jp*

## Contents

|                                                                                                    |     |
|----------------------------------------------------------------------------------------------------|-----|
| 1. General                                                                                         | S3  |
| 2. Computational Methods                                                                           | S3  |
| 3. Synthesis                                                                                       | S4  |
| 3.1. Synthesis of H <sub>2</sub> O@ <b>2</b> and H <sub>2</sub> O@ <b>3</b>                        | S4  |
| 3.2. Conversion of <b>2</b> into <b>1</b>                                                          | S11 |
| 4. Single Crystal X-Ray Structures                                                                 | S14 |
| 4.1. Crystal Structure of <b>2</b> •(CHCl <sub>3</sub> ) <sub>2</sub> •EtOH                        | S14 |
| 4.2. Crystal Structure of [(H <sub>2</sub> O) <sub>0.808(7)</sub> @ <b>3</b> ]•(ODCB) <sub>2</sub> | S16 |
| 5. DFT Calculations                                                                                | S18 |
| 6. Possible Formation Mechanism of <b>4</b>                                                        | S29 |
| 7. References                                                                                      | S30 |

## 1. General

The  $^1\text{H}$  and  $^{13}\text{C}$  NMR measurements were carried out at room temperature with JEOL JNM ECA500 and Bruker Avance III 800US Plus instruments. The NMR chemical shifts were reported in ppm with reference to residual protons and carbons of  $\text{CDCl}_3$  ( $\delta$  7.26 ppm in  $^1\text{H}$  NMR,  $\delta$  77.00 ppm in  $^{13}\text{C}$  NMR), *o*-dichlorobenzene- $d_4$  (ODCB- $d_4$ ,  $\delta$  7.20 ppm in  $^1\text{H}$  NMR,  $\delta$  132.35 ppm in  $^{13}\text{C}$  NMR) and acetone- $d_6$  ( $\delta$  2.05 ppm in  $^1\text{H}$  NMR,  $\delta$  29.92 ppm in  $^{13}\text{C}$  NMR). APCI (atmospheric pressure chemical ionization) mass spectra were measured on a Bruker micrOTOF-Q II. Cyclic voltammetry was conducted on a BAS Electrochemical Analyzer ALS620C using a three-electrode cell with a glassy carbon working electrode, a platinum wire counter electrode, and a  $\text{Ag}/\text{AgNO}_3$  reference electrode. The measurements were carried out under  $\text{N}_2$  atmosphere using ODCB solutions of 0.50 mM samples and 0.10 M tetrabutylammonium tetrafluoroborate ( $n\text{-Bu}_4\text{N}\cdot\text{BF}_4$ ) as a supporting electrolyte. The redox potentials were calibrated with ferrocene used as an internal standard which was added after each measurement. The high-performance liquid chromatography (HPLC) was performed with the use of a Cosmosil Buckyprep column (250 mm in length, 4.6 mm in inner diameter) for analytical purpose and the same columns (250 mm in length, 20 mm in inner diameter) for preparative purpose. Thin layer chromatography (TLC) was performed on glass plates coated with 0.25 mm thick silica gel 60F-254 (Merck). Column chromatography was performed using PSQ 60B (Fuji Silysia).

Toluene was purchased from Kanto Chemical Co., Inc. Trifluoroacetic anhydride, chloroform, and carbon disulfide were purchased from FUJIFILM Wako Pure Chemical Corporation. Ethyl acetate was purchased from Nacalai Tesque, Inc. *o*-Dichlorobenzene (ODCB) and 1-chloronaphthalene were purchased from Sigma-Aldrich Co. LLC.

Unless otherwise noted, all reactions were carried out under Ar atmosphere. Materials purchased from commercial suppliers were used without further purification.

## 2. Computational Methods

All calculations were conducted using the Gaussian 09 program. All structures at the stationary states were optimized at the B3LYP-D3/6-31G(d) level of theory without any symmetry assumptions and confirmed by the frequency analyses at the same level of theory.

### 3. Synthesis

#### 3.1. Synthesis of H<sub>2</sub>O@2 and H<sub>2</sub>O@3

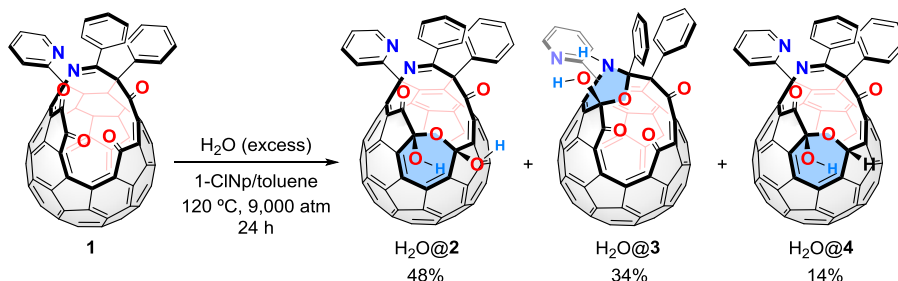

A typical procedure was shown. Powdery **1** (20.0 mg, 18.7  $\mu\text{mol}$ ) was dissolved in a mixed solvent system of 1-chloronaphthalene and toluene (9:1, 4.0 mL). The reaction mixture was heated at 120  $^{\circ}\text{C}$  under 9,000 atm for 24 h. The crude mixture was purified by silica gel column chromatography ( $\text{CS}_2/\text{EtOAc}$  (40:1) to (20:1)) to give H<sub>2</sub>O@1 (H<sub>2</sub>O: 99%, 9.87 mg, 8.95  $\mu\text{mol}$ , 48%) and a mixture of H<sub>2</sub>O@2 and H<sub>2</sub>O@3 (ca. 10 mg). The mixture was then purified by HPLC equipped with the Buckyprep column (7.5 mL/min, toluene, 50  $^{\circ}\text{C}$ ) to give H<sub>2</sub>O@2 (H<sub>2</sub>O: 81%, 7.02 mg, 6.38  $\mu\text{mol}$ , 34%) and H<sub>2</sub>O@3 (H<sub>2</sub>O: 93%, 2.94 mg, 2.71  $\mu\text{mol}$ , 14%) as a brown powder.

H<sub>2</sub>O@2 (H<sub>2</sub>O: 82%): <sup>1</sup>H NMR (500 MHz,  $\text{CDCl}_3$ )  $\delta$  8.57 (d, 1H,  $J = 4.58$  Hz), 8.29 (d, 2H,  $J = 6.87$  Hz), 7.90 (d, 1H,  $J = 8.02$  Hz), 7.81 (t, 1H,  $J = 8.02$  Hz), 7.74 (br, 1H), 7.42–7.33 (m, 1H), 7.28–7.21 (m, 3H), 5.61 (br s, 1H), 5.20 (s, 1H), –9.93 (s, 1.64H); <sup>13</sup>C NMR (126 MHz,  $\text{CS}_2/\text{acetone-}d_6$  (2:1))  $\delta$  194.15, 191.13, 165.49, 159.81, 150.89, 150.74, 150.66, 150.43, 150.37, 150.34, 150.10, 149.91, 149.65, 149.37, 149.31, 149.04, 148.99, 148.88, 148.51, 148.41, 147.96, 147.84, 147.27, 147.21, 146.67, 146.38, 146.22, 146.02, 145.97, 145.38, 144.77, 144.51, 144.02, 143.71, 143.21, 143.05, 142.42, 141.90, 141.54, 141.39, 141.35, 141.33, 141.06, 140.07, 139.65, 139.16, 138.63, 138.49, 138.10, 137.89, 137.78, 137.67, 137.64, 137.07, 136.91, 135.53, 135.13, 135.06, 134.66, 134.18, 132.13, 131.72, 131.40, 130.57, 130.19, 130.08, 128.24, 127.16, 126.60, 125.58, 124.67, 123.41, 110.38, 96.91, 72.78, 60.08 (The sum of carbon signals must be 76 in theory. Observed 76.); HRMS (APCI)  $m/z$ :  $[\text{M}]^-$  Calcd for  $\text{C}_{80}\text{H}_{18}\text{N}_2\text{O}_6$  (H<sub>2</sub>O@2) 1102.1170; Found 1102.1145.

H<sub>2</sub>O@3 (H<sub>2</sub>O: 87%): <sup>1</sup>H NMR (800 MHz,  $\text{ODCB-}d_4$ )  $\delta$  8.88 (d, 1H,  $J = 7.34$  Hz), 8.49 (d, 1H,  $J = 4.40$  Hz), 7.71 (br, 2H), 7.64 (d, 1H,  $J = 8.07$  Hz), 7.55–7.49 (m, 2H), 7.24–

7.22 (m, 2H), 7.14 (br, 2H), 7.02–6.99 (m, 1H), 6.75 (t, 1H,  $J = 6.60$  Hz), 6.62 (d, 1H,  $J = 6.60$  Hz), –9.47 (s, 1.74H);  $^{13}\text{C}$  NMR (201 MHz, ODCB- $d_4$ )  $\delta$  193.38, 191.18, 186.96, 165.00, 155.60, 149.93, 149.89, 149.55, 149.31, 149.22, 148.81, 148.75, 148.08, 147.97, 147.63, 147.21, 147.17, 146.88, 146.75, 146.57, 146.50, 145.79, 144.68, 144.55, 144.21, 144.17, 143.96, 143.90, 143.87, 143.70, 143.61, 143.08, 142.38, 141.86, 141.78, 141.00, 140.48, 140.36, 139.49, 139.45, 139.40, 139.10, 138.81, 137.87, 137.66, 137.05, 136.88, 136.71, 136.60, 136.57, 136.36, 135.53, 135.42, 135.39, 135.07, 134.87, 134.20, 133.90, 133.69, 131.15, 130.57, 129.20, 128.23, 128.20, 127.95, 127.79, 127.65, 126.58, 126.41, 126.27, 122.73, 121.84, 96.45, 93.65, 67.04, 63.27 (The sum of carbon signals must be 76 in theory. Observed 76.); HRMS (APCI)  $m/z$ :  $[\text{M}]^-$  Calcd for  $\text{C}_{80}\text{H}_{18}\text{N}_2\text{O}_6$  ( $\text{H}_2\text{O}@3$ ) 1102.1170; Found 1102.1169.

$\text{H}_2\text{O}@4$  ( $\text{H}_2\text{O}$ : 85%):  $^1\text{H}$  NMR (500 MHz,  $\text{CDCl}_3$ )  $\delta$  8.56 (d, 1H,  $J = 4.58$  Hz), 8.26 (d, 2H,  $J = 8.02$  Hz), 7.88 (d, 1H,  $J = 8.02$  Hz), 7.81–7.73 (m, 2H), 7.67 (s, 1H), 7.43–7.29 (m, 5H), 7.26–7.17 (m, 3H), –9.81 (s, 1.70H);  $^{13}\text{C}$  NMR (126 MHz,  $\text{CDCl}_3$ )  $\delta$  194.87, 191.28, 164.52, 161.30, 150.40, 150.06, 149.93, 149.77, 149.56, 148.95, 148.89, 148.83, 148.74, 148.64, 148.02, 147.93, 147.87, 147.76, 147.34, 147.23, 147.02, 146.59, 146.37, 146.27, 146.06, 145.87, 145.71, 145.10, 144.79, 144.73, 144.38, 143.78, 143.75, 142.39, 142.34, 141.77, 140.94, 140.87, 140.82, 139.80, 139.34, 139.09, 138.47, 137.42, 137.29, 137.15, 136.55, 136.10, 135.31, 134.46, 134.25, 133.21, 133.05, 132.68, 130.45, 129.84, 129.56, 127.61, 126.77, 125.62, 124.09, 122.71, 94.42, 80.49, 76.27, 59.69 (The sum of carbon signals must be 76 in theory. Observed 67. The nine  $\text{sp}^2$  carbon signals are overlapped in the aromatic region.); HRMS (APCI)  $m/z$ :  $[\text{M}]^-$  Calcd for  $\text{C}_{80}\text{H}_{18}\text{N}_2\text{O}_5$  ( $\text{H}_2\text{O}@4$ ) 1102.1221; Found 1086.1216.

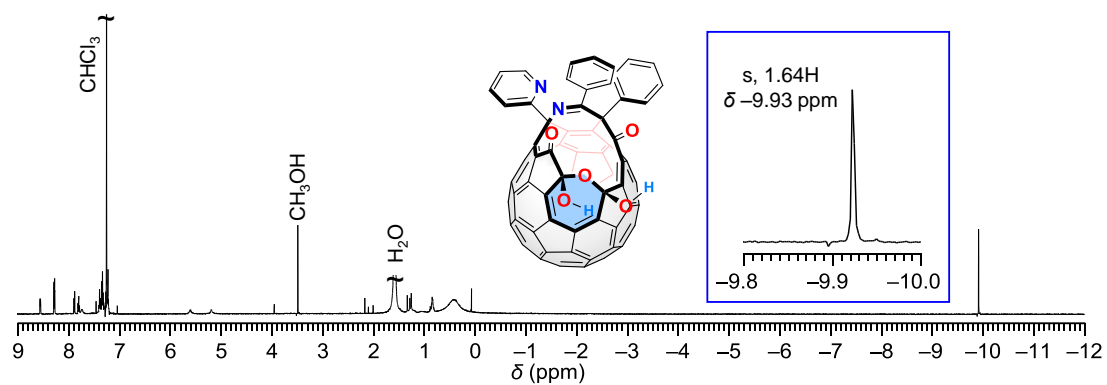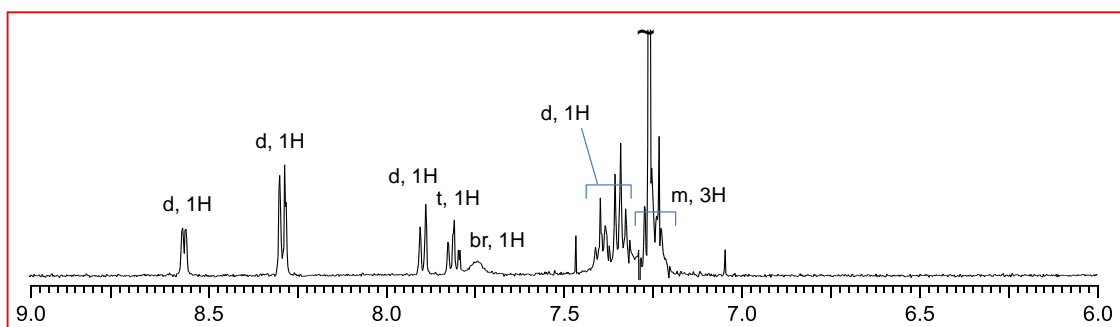

**Figure S1.** <sup>1</sup>H NMR spectra (500 MHz, CDCl<sub>3</sub>) of H<sub>2</sub>O@**2**.

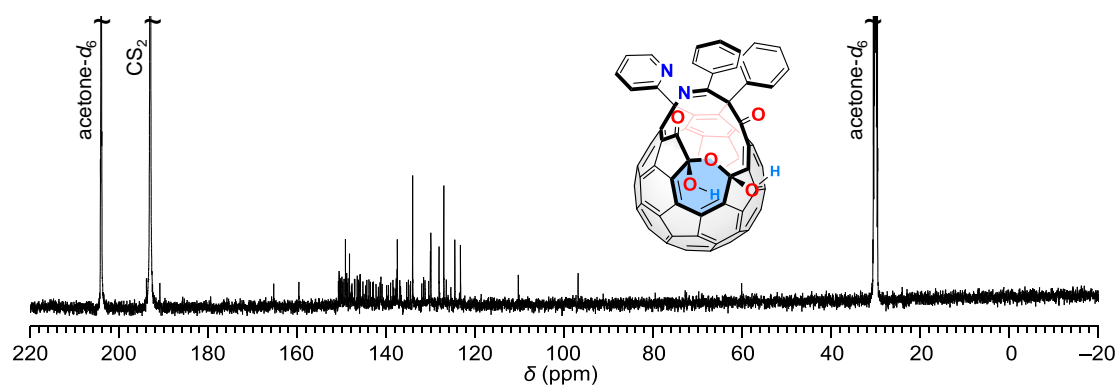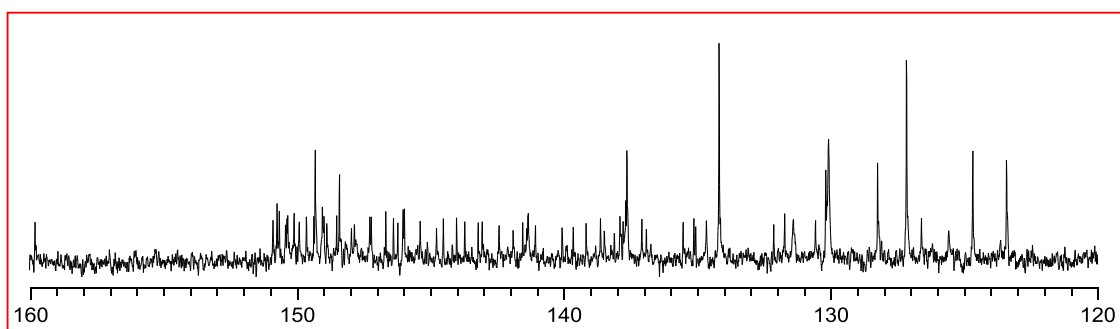

**Figure S2.** <sup>13</sup>C NMR spectra (126 MHz, CS<sub>2</sub>/acetone-*d*<sub>6</sub> (2:1)) of H<sub>2</sub>O@**2**.

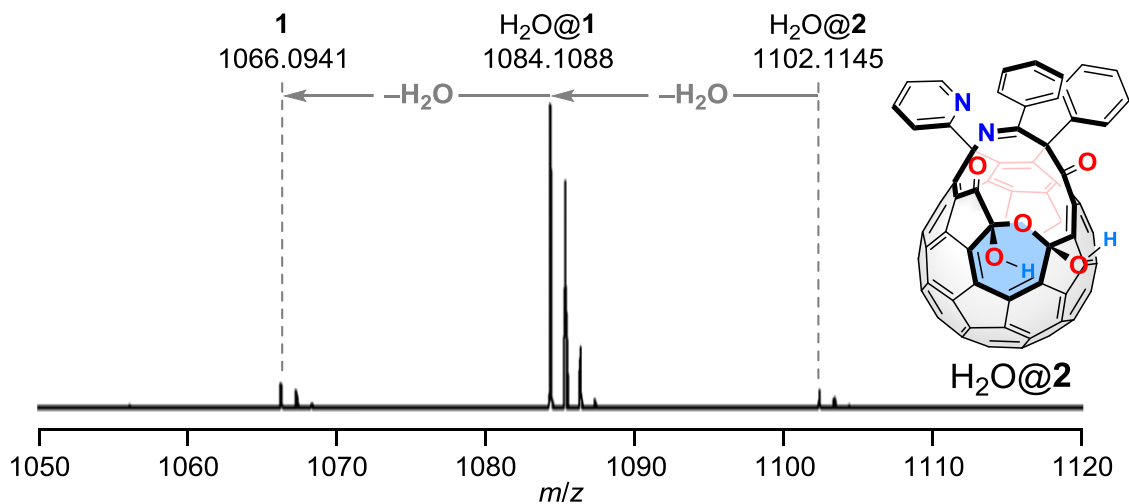

**Figure S3.** APCI mass spectrum (negative ion mode) of H<sub>2</sub>O@2 (H<sub>2</sub>O: 90%).

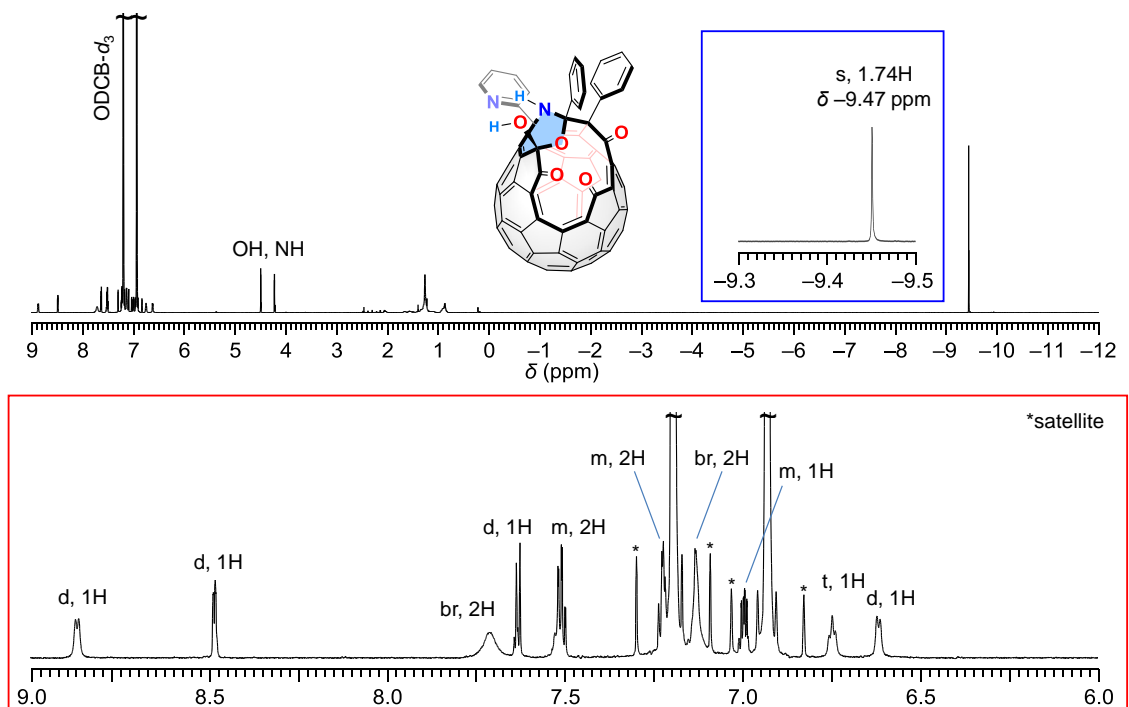

**Figure S4.** <sup>1</sup>H NMR spectra (800 MHz, ODCB-*d*<sub>4</sub>) of H<sub>2</sub>O@3.

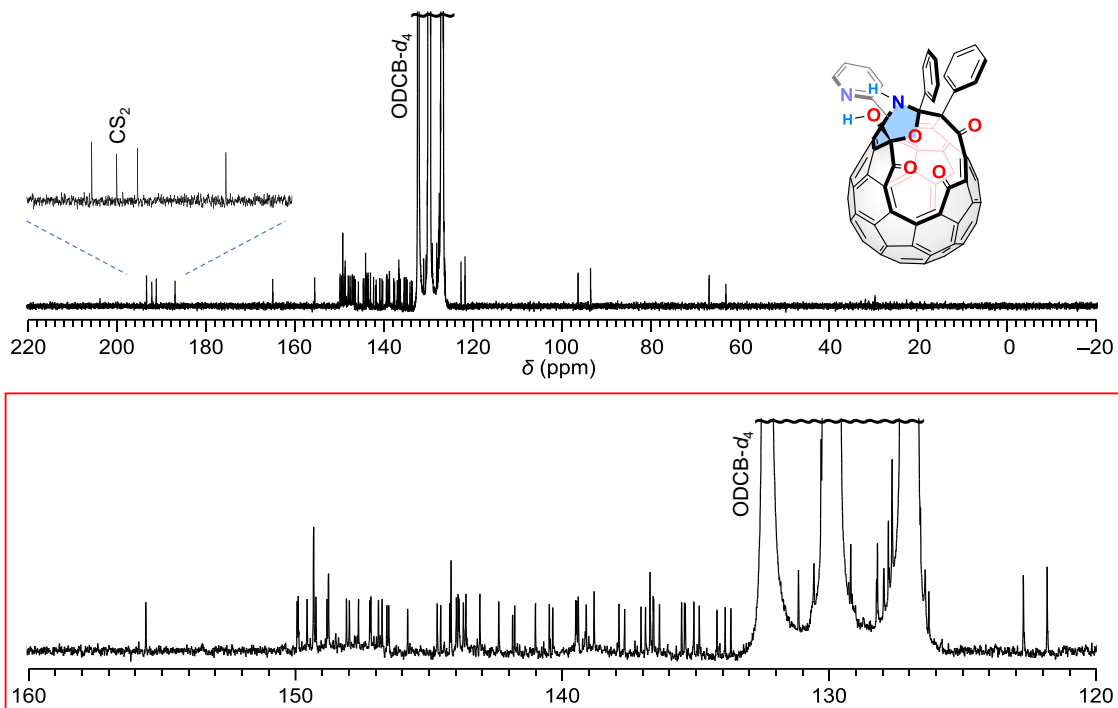

**Figure S5.**  $^{13}\text{C}$  NMR spectra (201 MHz,  $\text{ODCB-d}_4$ ) of  $\text{H}_2\text{O}@3$ .

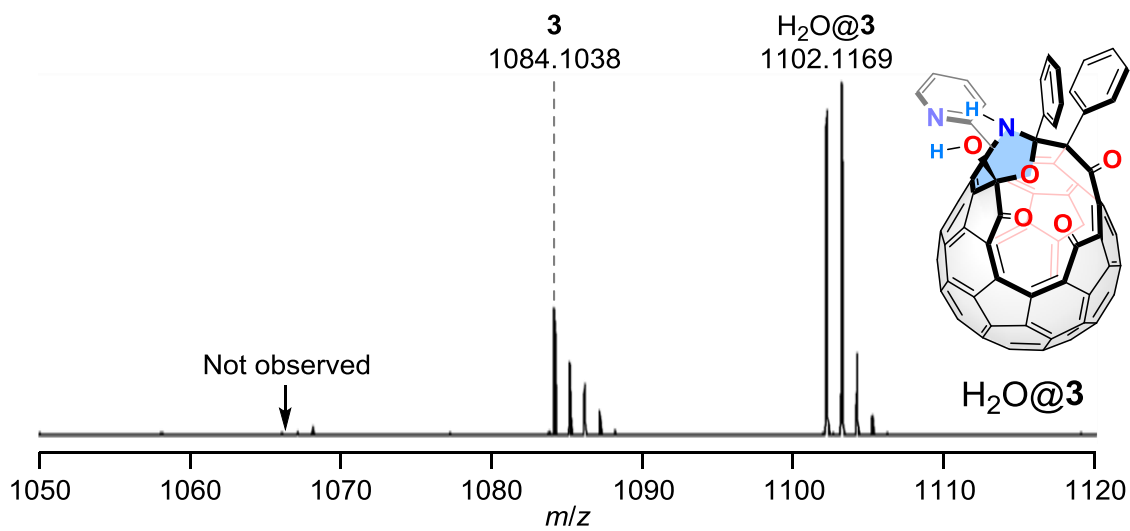

**Figure S6.** APCI mass spectrum (negative ion mode) of  $\text{H}_2\text{O}@3$  ( $\text{H}_2\text{O}$ : 70%).



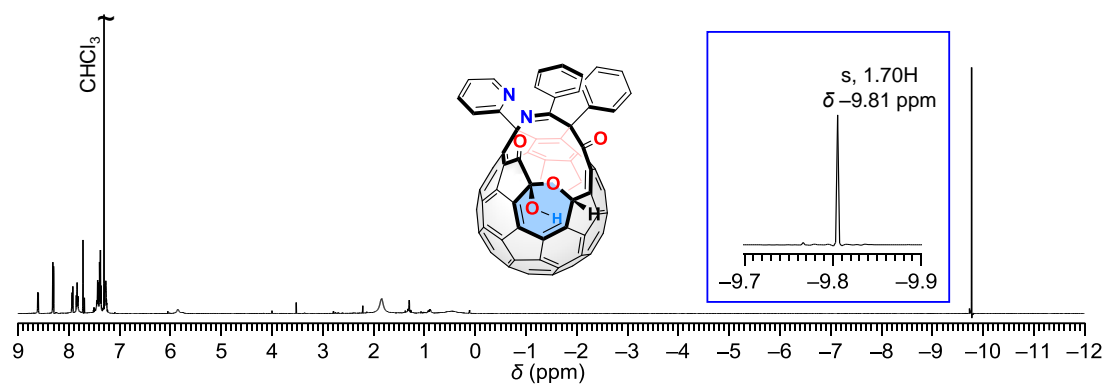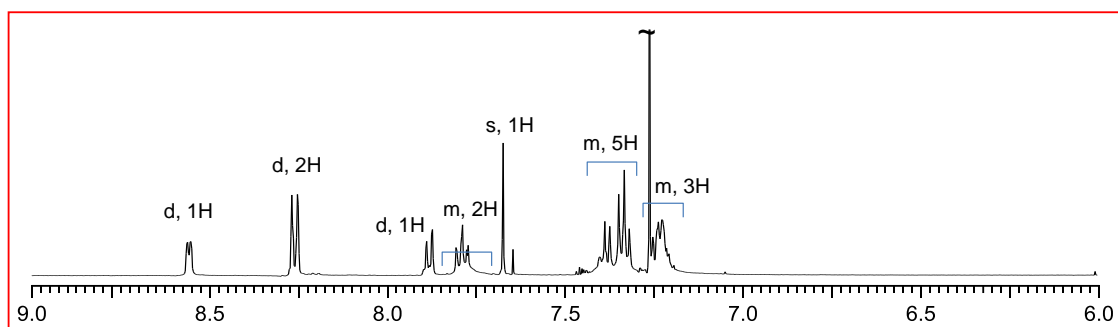

**Figure S7.**  $^1\text{H}$  NMR spectra (500 MHz,  $\text{CDCl}_3$ ) of  $\text{H}_2\text{O}@4$ .

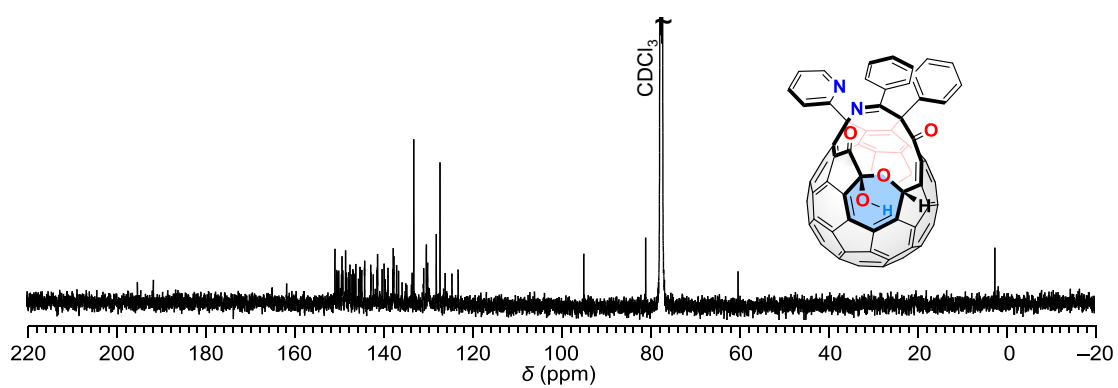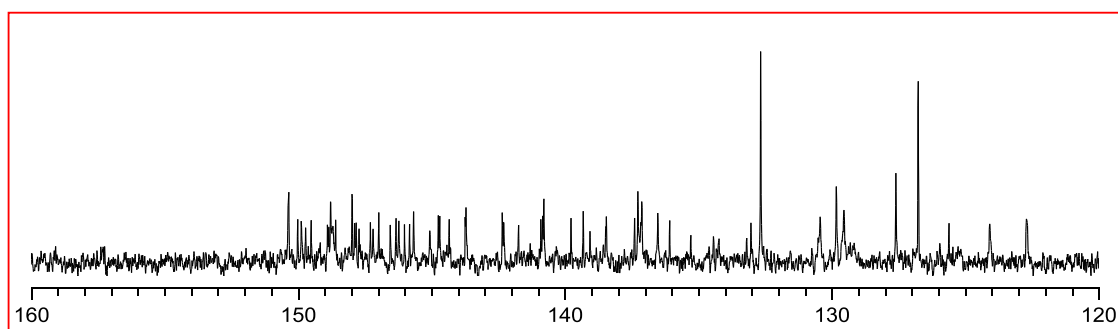

**Figure S8.**  $^{13}\text{C}$  NMR spectra (126 MHz,  $\text{CDCl}_3$ ) of  $\text{H}_2\text{O}@4$ .

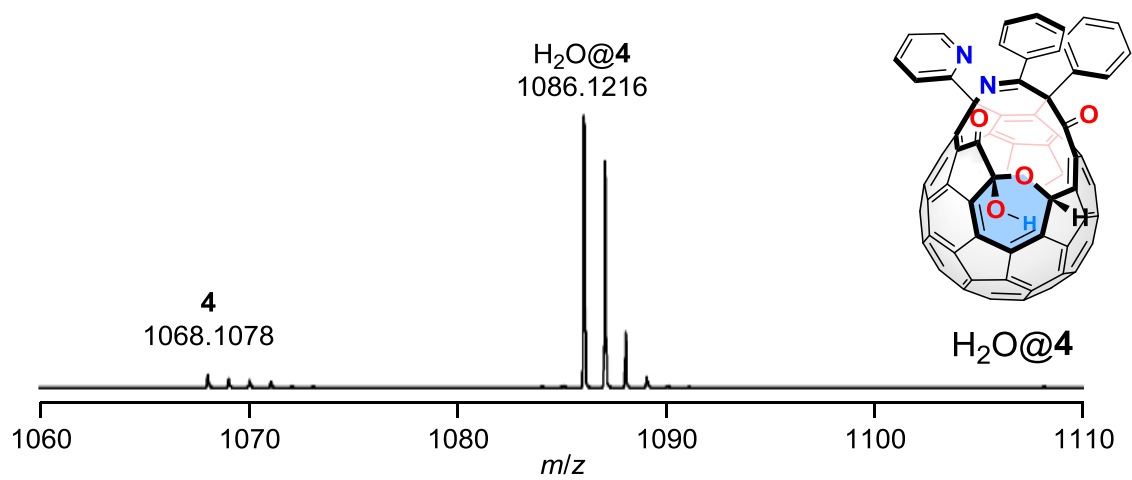

**Figure S9.** APCI mass spectrum (negative ion mode) of H<sub>2</sub>O@4 (H<sub>2</sub>O: 95%).

### 3.2. Conversion of **2** into **1**

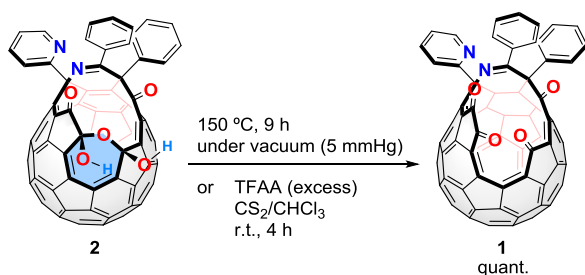

Powdery **2** (10.5 mg, 9.68  $\mu\text{mol}$ ) was placed into a vial which was heated at 150 °C (aluminum block) under vacuum (5 mmHg) for 9 h, quantitatively affording **1** (10.3 mg, 9.65  $\mu\text{mol}$ ) as a brown powder. The reaction progress was monitored by HPLC and <sup>1</sup>H NMR.

As an alternative method, to a vial containing **1** (10.3 mg, 9.49  $\mu\text{mol}$ ), a mixed solvent of TFAA (trifluoroacetic anhydride, 0.30 mL), CS<sub>2</sub> (1.00 mL), and CHCl<sub>3</sub> (1.00 mL) were added. The resultant suspension was stirred at room temperature for 4 h. During the reaction, the suspension became clear dark brown solution (nearly one hour later). After the removal of solvent by evaporation, **1** (10.1 mg, 9.47  $\mu\text{mol}$ ) was quantitatively obtained as a brown powder. The reaction progress was monitored by HPLC and <sup>1</sup>H NMR.

**1**: <sup>1</sup>H NMR (500 MHz, ODCB-*d*<sub>4</sub>)  $\delta$  8.46 (d, 1H, *J* = 4.01 Hz), 8.09 (d, 2H, *J* = 7.14 Hz), 7.85 (d, 1H, *J* = 8.02 Hz), 7.66–7.52 (m, 2H), 7.32 (br, 1H), 7.18–6.99 (m, 7H); <sup>13</sup>C NMR (126 MHz, ODCB-*d*<sub>4</sub>)  $\delta$  191.56, 187.59, 183.32, 179.94, 165.05, 163.84, 150.69, 149.93, 149.80, 149.58, 149.53, 149.08, 148.63, 148.57, 148.35, 148.13, 147.89, 147.73, 147.33, 147.27, 146.77, 146.66, 146.58, 146.30, 144.48, 144.37, 144.34, 144.30, 144.20, 144.17, 143.90, 143.78, 143.61, 143.27, 142.13, 141.85, 141.78, 141.54, 141.28, 140.55, 139.99, 139.24, 139.11, 138.83, 138.74, 138.06, 137.05, 136.93, 136.89, 136.20, 135.37, 134.97, 134.93, 134.01, 133.69, 133.49, 132.82, 132.63, 132.10, 131.62, 130.42, 129.58, 129.50, 129.12, 128.70, 127.71, 127.56, 126.72, 124.19, 122.67, 73.08, 60.78 (The sum of carbon signals must be 76 in theory. Observed 72. The four sp<sup>2</sup> carbon signals are overlapped in the aromatic region.); HRMS (APCI) *m/z*: [M]<sup>+</sup> Calcd for C<sub>80</sub>H<sub>14</sub>N<sub>2</sub>O<sub>4</sub> (**1**) 1066.0959; Found 1066.0955.

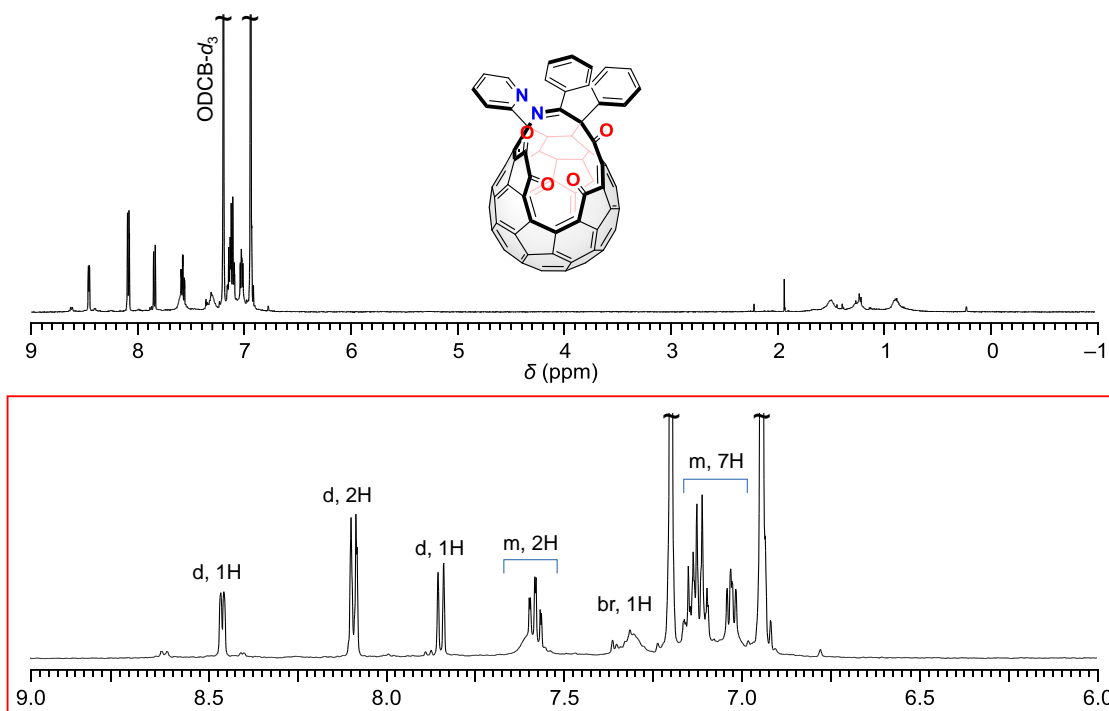

**Figure S10.**  $^1\text{H}$  NMR spectra (500 MHz,  $\text{ODCB-d}_4$ ) of **1**.

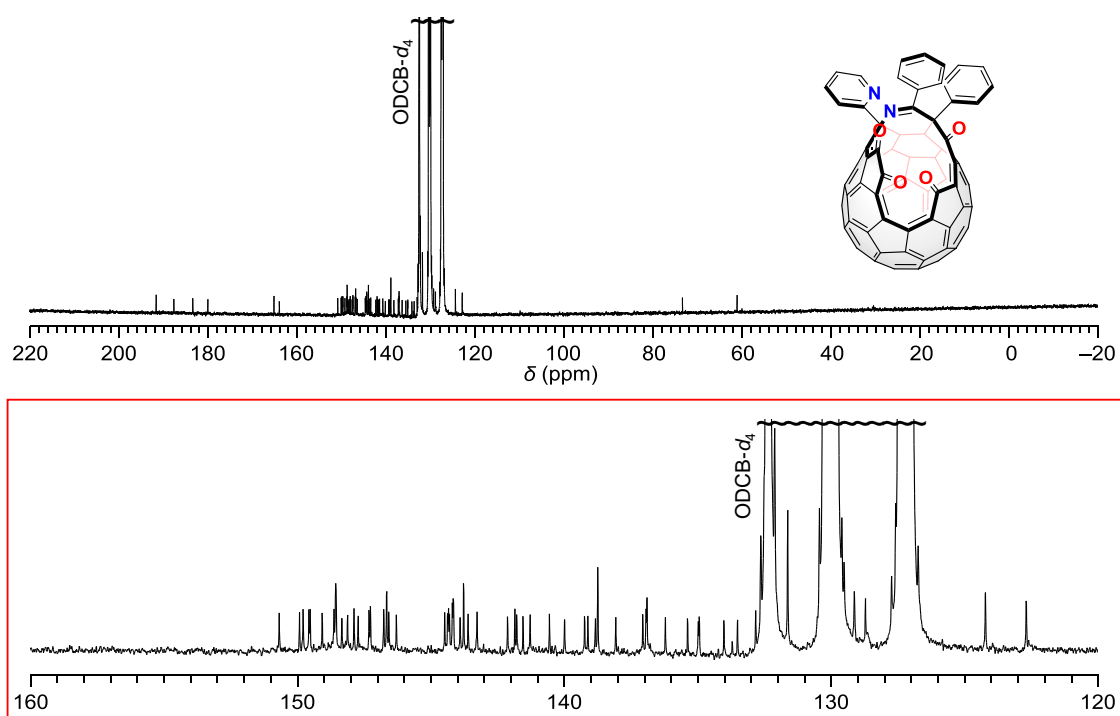

**Figure S11.**  $^{13}\text{C}$  NMR spectra (126 MHz,  $\text{ODCB-d}_4$ ) of **1**.

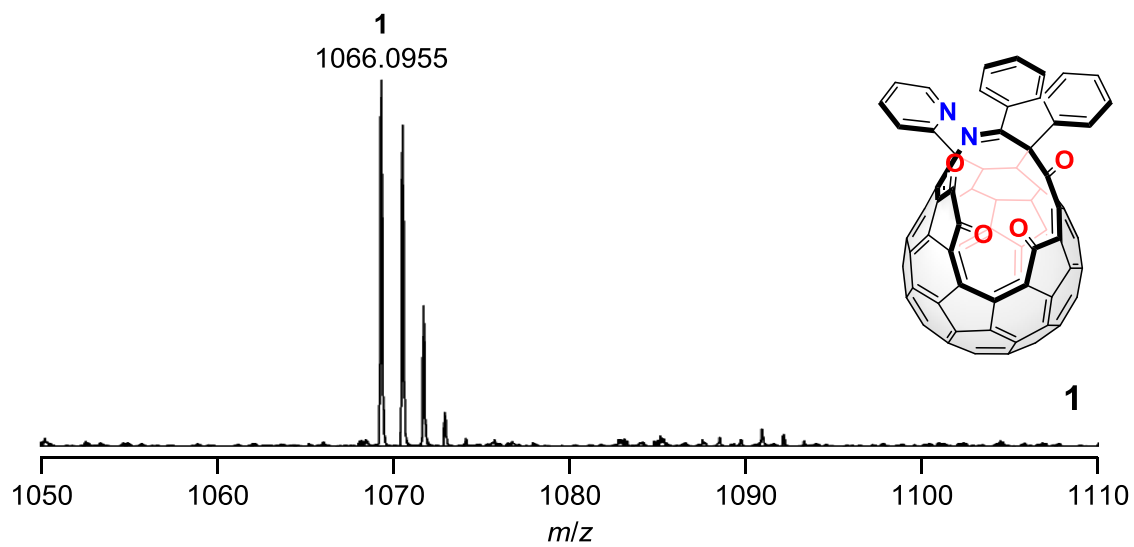

**Figure S12.** APCI mass spectrum (negative ion mode) of **1**.

## 4. Single Crystal X-Ray-Structures

### 4.1. Crystal Structure of 2•(CHCl<sub>3</sub>)<sub>2</sub>•EtOH

Single crystals of **2** were obtained from a CHCl<sub>3</sub>/ethanol solution by slow evaporation. Intensity data were collected at 100 K on a Bruker Single Crystal CCD X-ray Diffractometer (SMART APEX II) with Mo K $\alpha$  radiation ( $\lambda = 0.71073$  Å) and graphite monochromator. A total of 12897 reflections were measured at the maximum  $2\theta$  angle of 49.98°, of which 9398 were independent reflections ( $R_{\text{int}} = 0.0198$ ). The structure was solved by direct methods (SHELXT-2014/5<sup>1</sup>) and refined by the full-matrix least-squares on  $F^2$  (SHELXL-2018/3<sup>1</sup>). A chloroform molecule was disordered, which was solved using appropriate models. Thus, (C84–Cl4–Cl5–Cl6) and (C85–Cl7–Cl8–Cl9) were placed and their occupancies were refined to be 0.870(3) and 0.130(3), respectively. All non-hydrogen atoms were refined anisotropically. All hydrogen atoms were placed using AFIX instructions. The crystal data are as follows: C<sub>84</sub>H<sub>24</sub>Cl<sub>6</sub>N<sub>2</sub>O<sub>6</sub>; FW = 1369.75, crystal size 0.21 × 0.05 × 0.02 mm<sup>3</sup>, triclinic,  $P-1$ ,  $a = 9.957(3)$  Å,  $b = 15.514(5)$  Å,  $c = 19.041(6)$  Å,  $\alpha = 77.394(4)^\circ$ ,  $\beta = 85.946(3)^\circ$ ,  $\gamma = 71.397(3)^\circ$ ,  $V = 2720.4(14)$  Å<sup>3</sup>,  $Z = 2$ ,  $D_c = 1.672$  g cm<sup>-3</sup>. The refinement converged to  $R_1 = 0.0491$ ,  $wR_2 = 0.1194$  ( $I > 2\sigma(I)$ ), GOF = 1.053. The data was deposited at the Cambridge Crystallographic Data Centre (CCDC 2040746).

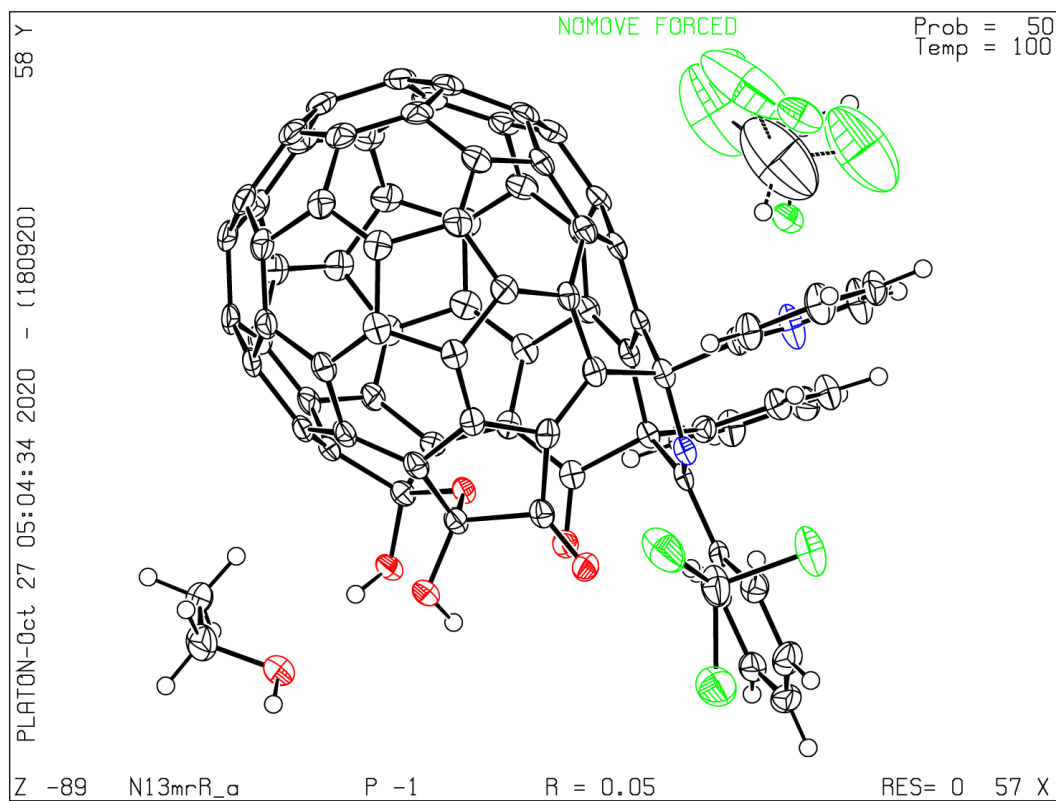

**Figure S13.** Single crystal X-ray structure of  $2 \cdot (\text{CHCl}_3)_2 \cdot \text{EtOH}$ .

## 4.2. Crystal Structure of $[(\text{H}_2\text{O})_{0.808(7)}@3]\cdot(\text{ODCB})_2$

Single crystals of **2** were obtained from an ODCB solution at 160 °C. Intensity data were collected at 100 K on a Bruker Single Crystal CCD X-ray Diffractometer (SMART APEX II) with Mo  $K\alpha$  radiation ( $\lambda = 0.71073 \text{ \AA}$ ) and graphite monochromator. A total of 22927 reflections were measured at the maximum  $2\theta$  angle of  $50.08^\circ$ , of which 8680 were independent reflections ( $R_{\text{int}} = 0.0275$ ). The structure was solved by direct methods (SHELXT-2014/5<sup>1</sup>) and refined by the full-matrix least-squares on  $F^2$  (SHELXL-2018/3<sup>1</sup>). A chloroform molecule was disordered, which was solved using appropriate models. Thus, (C4–C5–C6–C7–C8–C9–C11–C12) and (C10–C11–C12–C13–C14–C15–C13–C14) were placed and their occupancies were refined to be 0.791(2) and 0.209(2), respectively. The occupancy of the encapsulated water molecule was refined to be 0.808(7). All non-hydrogen atoms were refined anisotropically. All hydrogen atoms except for that of the encapsulated water molecule were placed using AFIX instructions. The crystal data are as follows:  $\text{C}_{86}\text{H}_{21.62}\text{Cl}_2\text{N}_2\text{O}_{5.81}$ ; FW = 1246.49, crystal size  $0.18 \times 0.14 \times 0.03 \text{ mm}^3$ , monoclinic,  $P2_1/n$ ,  $a = 10.198(7) \text{ \AA}$ ,  $b = 28.838(19) \text{ \AA}$ ,  $c = 17.362(11) \text{ \AA}$ ,  $\beta = 104.033(8)^\circ$ ,  $V = 4953(6) \text{ \AA}^3$ ,  $Z = 4$ ,  $D_c = 1.671 \text{ g cm}^{-3}$ . The refinement converged to  $R_1 = 0.0406$ ,  $wR_2 = 0.1010$  ( $I > 2\sigma(I)$ ), GOF = 1.025. The data was deposited at the Cambridge Crystallographic Data Centre (CCDC 2040747).



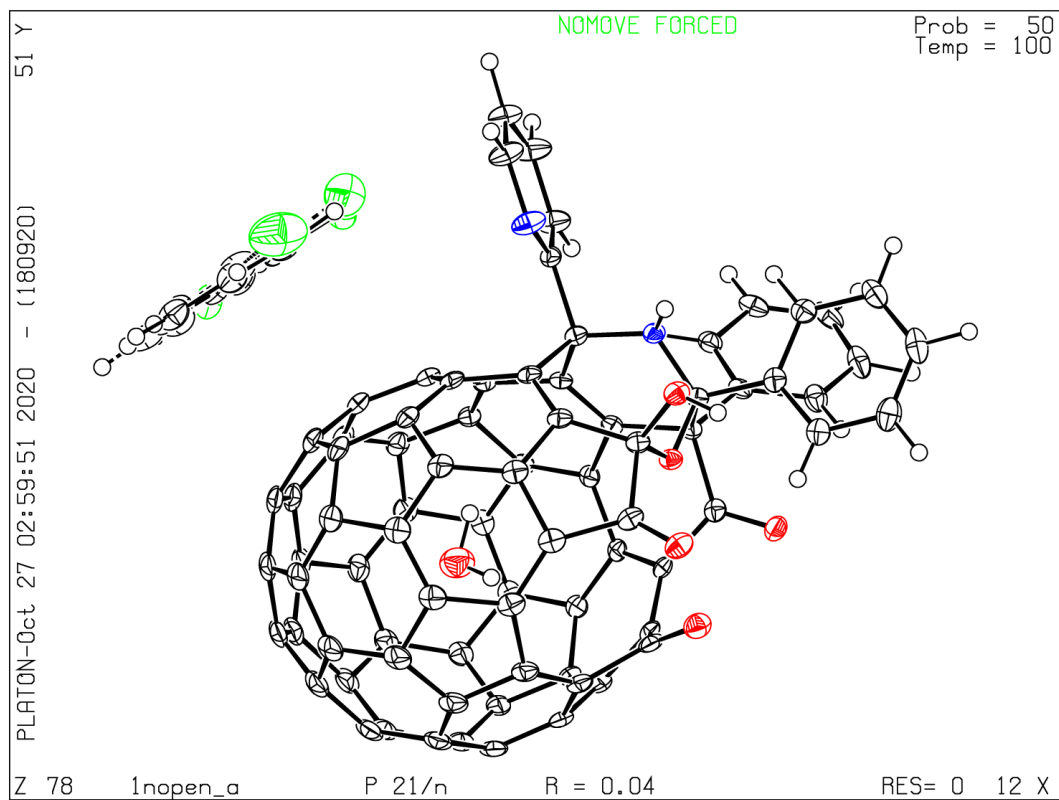

**Figure S14.** Single crystal X-ray structure of  $[(\text{H}_2\text{O})_{0.808(7)}@3]\cdot(\text{ODCB})_2$ .

## 5. DFT Calculations

The energy profile on the transannular cyclization of **1** was computed at the B3LYP-D3/6-31G(d) level of theory (298 K, 1 atm). The reaction volumes  $\Delta V$  and the volumes of activation  $\Delta V^\ddagger$ , which are defined as volume changes in the reaction systems, were calculated using the equation:  $\Delta H = \Delta U + P\Delta V$ , where  $H$  is enthalpy,  $U$  internal energy, and  $P$  pressure. The reactions with negative  $\Delta V$  values are considered to be effective at high pressures.

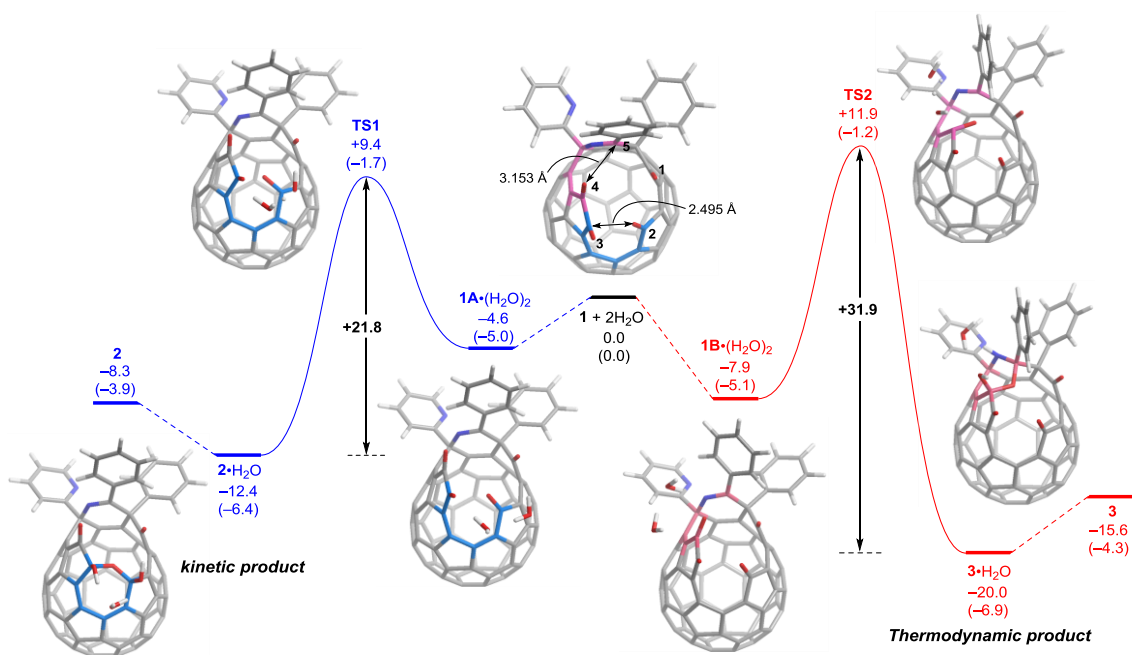

**Figure S15.** Energy profile on the transannular cyclization of **1**, calculated at the B3LYP-D3/6-31G(d) level of theory.

**Table S1.** Optimized structure of H<sub>2</sub>O (B3LYP-D3/6-31G(d))

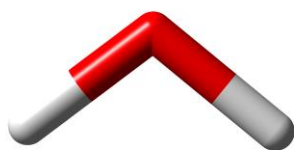

Standard orientation:

| Center Number | Atomic Number | Atomic Type | Coordinates (Angstroms) |           |           |
|---------------|---------------|-------------|-------------------------|-----------|-----------|
|               |               |             | X                       | Y         | Z         |
| 1             | 8             | 0           | 0.000000                | 0.000000  | 0.119774  |
| 2             | 1             | 0           | -0.000000               | 0.761454  | -0.479095 |
| 3             | 1             | 0           | -0.000000               | -0.761454 | -0.479095 |

The total electronic energy was calculated to be -76.4089616 Hartree.

**Table S2.** Optimized structure of **1** (B3LYP-D3/6-31G(d))

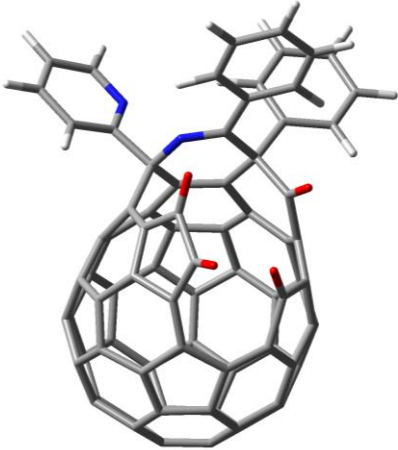

Standard orientation:

| Center Number | Atomic Number | Atomic Type | Coordinates (Angstroms) |           |           |
|---------------|---------------|-------------|-------------------------|-----------|-----------|
|               |               |             | X                       | Y         | Z         |
| 1             | 6             | 0           | -3.690557               | 1.119115  | -2.925423 |
| 2             | 6             | 0           | -2.276658               | 1.196985  | -3.252778 |
| 3             | 6             | 0           | -1.567681               | 0.032425  | -3.499608 |
| 4             | 6             | 0           | -2.221232               | -1.261912 | -3.415266 |
| 5             | 6             | 0           | -3.567665               | -1.343156 | -3.061541 |
| 6             | 6             | 0           | -4.317912               | -0.124627 | -2.810829 |
| 7             | 6             | 0           | -1.668617               | 2.256938  | -2.469247 |
| 8             | 6             | 0           | -0.226945               | -0.093333 | -2.995553 |
| 9             | 6             | 0           | -1.260387               | -2.182883 | -2.849669 |
| 10            | 6             | 0           | -4.001972               | -2.348565 | -2.105820 |
| 11            | 6             | 0           | -5.220038               | -0.377233 | -1.700207 |
| 12            | 6             | 0           | -3.978619               | 2.172634  | -1.975186 |
| 13            | 6             | 0           | -3.069557               | -3.235331 | -1.559656 |
| 14            | 6             | 0           | -1.671460               | -3.154222 | -1.945151 |
| 15            | 6             | 0           | -3.113136               | -3.548378 | -0.145026 |
| 16            | 6             | 0           | -0.850871               | -3.411069 | -0.781102 |
| 17            | 6             | 0           | -0.370355               | 2.125812  | -1.924856 |
| 18            | 6             | 0           | -0.020099               | -1.475552 | -2.617934 |
| 19            | 6             | 0           | -1.745502               | -3.655231 | 0.322669  |
| 20            | 6             | 0           | 0.827507                | -1.780655 | -1.555895 |
| 21            | 6             | 0           | 0.382445                | 0.921931  | -2.249928 |
| 22            | 6             | 0           | -5.013365               | -1.746099 | -1.255351 |
| 23            | 6             | 0           | -5.482238               | 0.629893  | -0.769494 |
| 24            | 6             | 0           | -0.072129               | 2.753653  | -0.625260 |
| 25            | 6             | 0           | -4.868743               | 1.939092  | -0.918734 |
| 26            | 6             | 0           | -2.746641               | 2.896762  | -1.734509 |
| 27            | 6             | 0           | -5.518513               | 0.316042  | 0.648526  |
| 28            | 6             | 0           | -4.566234               | 2.448233  | 0.402473  |
| 29            | 6             | 0           | -2.487702               | 3.430237  | -0.484630 |
| 30            | 6             | 0           | 0.381083                | -2.762117 | -0.570492 |
| 31            | 6             | 0           | -5.049009               | -2.046357 | 0.111710  |
| 32            | 6             | 0           | 1.501739                | 0.553385  | -1.421386 |
| 33            | 6             | 0           | -4.932046               | 1.426534  | 1.372347  |
| 34            | 6             | 0           | -3.420958               | 3.209440  | 0.611486  |
| 35            | 6             | 0           | -1.144670               | 3.378030  | 0.038296  |
| 36            | 6             | 0           | -1.260020               | 3.230794  | 1.459008  |
| 37            | 6             | 0           | 1.090208                | 2.327032  | 0.160067  |
| 38            | 6             | 0           | 1.748914                | -0.755384 | -1.115046 |
| 39            | 6             | 0           | 2.193259                | -1.953169 | 1.015556  |
| 40            | 6             | 0           | -2.628967               | 3.017746  | 1.805826  |
| 41            | 6             | 0           | -2.913810               | 1.969361  | 2.686725  |
| 42            | 6             | 0           | -1.874103               | 1.175940  | 3.326560  |
| 43            | 6             | 0           | -4.093353               | 1.175880  | 2.461877  |
| 44            | 6             | 0           | -4.074253               | -2.957336 | 0.674463  |
| 45            | 6             | 0           | 1.833660                | 1.790425  | 2.716842  |
| 46            | 6             | 0           | -5.287266               | -0.987573 | 1.082038  |
| 47            | 6             | 0           | -4.426495               | -1.228230 | 2.227524  |
| 48            | 6             | 0           | 1.008250                | 2.301147  | 1.552133  |
| 49            | 6             | 0           | 0.830516                | -2.531043 | 0.787604  |
| 50            | 6             | 0           | -0.096866               | -2.637902 | 1.823986  |
| 51            | 6             | 0           | -0.275989               | 2.573773  | 2.156034  |
| 52            | 6             | 0           | -0.563028               | 1.657905  | 3.236480  |
| 53            | 6             | 0           | -3.797405               | -0.169270 | 2.888888  |
| 54            | 6             | 0           | -2.410765               | -0.234912 | 3.367366  |
| 55            | 6             | 0           | 0.785346                | 1.425732  | 3.846297  |
| 56            | 6             | 0           | -3.696179               | -2.440848 | 1.982983  |
| 57            | 6             | 0           | -1.392025               | -3.162921 | 1.574429  |
| 58            | 6             | 0           | -0.237407               | -1.656550 | 2.981691  |
| 59            | 6             | 0           | -2.378525               | -2.501008 | 2.410020  |
| 60            | 6             | 0           | -1.731795               | -1.439408 | 3.144421  |
| 61            | 6             | 0           | 2.211860                | 1.658935  | -0.660057 |
| 62            | 6             | 0           | 2.859015                | -1.192438 | -0.176347 |
| 63            | 6             | 0           | 3.668809                | 0.019516  | 0.358490  |
| 64            | 7             | 0           | 3.123337                | 1.233099  | 0.165895  |
| 65            | 6             | 0           | 3.753201                | -2.123540 | -1.028514 |
| 66            | 6             | 0           | 2.866323                | 2.651810  | -1.647827 |
| 67            | 8             | 0           | 2.756401                | -2.121638 | 2.076607  |
| 68            | 8             | 0           | 3.023175                | 1.767984  | 2.901224  |
| 69            | 6             | 0           | 3.011507                | 4.006437  | -1.339309 |
| 70            | 6             | 0           | 6.82147                 | 4.826002  | -2.244381 |
| 71            | 6             | 0           | 4.185943                | 4.263858  | -3.417564 |
| 72            | 6             | 0           | 4.000594                | 2.896976  | -3.625224 |
| 73            | 7             | 0           | 3.357333                | 2.100782  | -2.763115 |
| 74            | 6             | 0           | 3.828194                | -3.504932 | -0.826726 |
| 75            | 6             | 0           | 4.615098                | -4.292729 | -1.665135 |
| 76            | 6             | 0           | 5.329085                | -3.717502 | -2.713717 |
| 77            | 6             | 0           | 5.247341                | -2.328833 | -2.924183 |
| 78            | 6             | 0           | 4.460039                | -1.545770 | -2.091934 |
| 79            | 8             | 0           | 0.643631                | -1.046288 | 3.542055  |
| 80            | 8             | 0           | 1.063621                | 1.266287  | 5.007259  |
| 81            | 6             | 0           | 6.726078                | -1.508968 | 2.096537  |
| 82            | 6             | 0           | 5.509121                | -1.418339 | 1.423016  |
| 83            | 6             | 0           | 4.947789                | -0.169373 | 1.113278  |
| 84            | 6             | 0           | 5.648730                | 0.986365  | 1.510907  |
| 85            | 6             | 0           | 6.859497                | 0.894498  | 2.186562  |
| 86            | 6             | 0           | 7.408811                | -0.356026 | 2.480777  |
| 87            | 1             | 0           | 2.612496                | 4.401557  | -0.411286 |
| 88            | 1             | 0           | 3.810497                | 5.884628  | -2.036088 |
| 89            | 1             | 0           | 4.713111                | 4.865064  | -4.151897 |
| 90            | 1             | 0           | 4.384655                | 2.415192  | -4.522465 |
| 91            | 1             | 0           | 3.293835                | -3.971276 | -0.004466 |
| 92            | 1             | 0           | 4.669389                | -5.368724 | -1.492657 |
| 93            | 1             | 0           | 5.942995                | -4.334819 | -3.363690 |
| 94            | 1             | 0           | 5.795763                | -1.877795 | -3.741152 |
| 95            | 1             | 0           | 4.376643                | -0.476865 | -2.274471 |
| 96            | 1             | 0           | 7.135685                | -2.489481 | 2.323444  |
| 97            | 1             | 0           | 5.003732                | -2.332078 | 1.154687  |

|     |   |   |          |           |          |
|-----|---|---|----------|-----------|----------|
| 98  | 1 | 0 | 5.213299 | 1.951922  | 1.291058 |
| 99  | 1 | 0 | 7.374812 | 1.802475  | 2.488260 |
| 100 | 1 | 0 | 8.356706 | -0.429767 | 3.007724 |

The total electronic energy was calculated to be -3467.2768334 Hartree.

**Table S3.** Optimized structure of **1A•(H<sub>2</sub>O)<sub>2</sub>** (B3LYP-D3/6-31G(d))

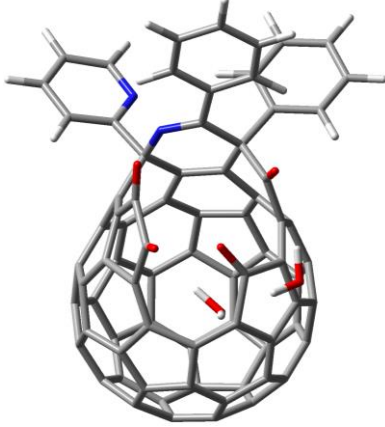

Standard orientation:

| Center Number | Atomic Number | Atomic Type | Coordinates (Angstroms) |           |           |
|---------------|---------------|-------------|-------------------------|-----------|-----------|
|               |               |             | X                       | Y         | Z         |
| 1             | 6             | 0           | -3.699507               | -3.323535 | 0.214638  |
| 2             | 6             | 0           | -2.285081               | -3.652640 | 0.271689  |
| 3             | 6             | 0           | -1.571051               | -3.400916 | 1.431637  |
| 4             | 6             | 0           | -2.219621               | -2.796907 | 2.582268  |
| 5             | 6             | 0           | -3.566046               | -2.438858 | 2.516062  |
| 6             | 6             | 0           | -4.321248               | -2.707637 | 1.304269  |
| 7             | 6             | 0           | -1.683015               | -3.370479 | -1.018547 |
| 8             | 6             | 0           | -0.231535               | -2.886605 | 1.334569  |
| 9             | 6             | 0           | -1.254853               | -1.909323 | 3.192812  |
| 10            | 6             | 0           | -3.994891               | -1.153741 | 3.042546  |
| 11            | 6             | 0           | -5.221251               | -1.588037 | 1.082060  |
| 12            | 6             | 0           | -3.993812               | -2.889718 | -1.134716 |
| 13            | 6             | 0           | -3.058653               | -0.295942 | 3.626644  |
| 14            | 6             | 0           | -1.662319               | -0.686810 | 3.712819  |
| 15            | 6             | 0           | -3.094408               | 1.122822  | 3.330102  |
| 16            | 6             | 0           | -0.835269               | 0.477920  | 3.481483  |
| 17            | 6             | 0           | -0.387920               | -2.814266 | -1.127592 |
| 18            | 6             | 0           | -0.015703               | -1.987894 | 2.448305  |
| 19            | 6             | 0           | -1.725331               | 1.588532  | 3.242243  |
| 20            | 6             | 0           | 0.841024                | -0.899832 | 2.302050  |
| 21            | 6             | 0           | 0.369658                | -2.612936 | 0.100542  |
| 22            | 6             | 0           | -5.005396               | -0.620814 | 2.146350  |
| 23            | 6             | 0           | -5.488578               | -1.152595 | -0.217040 |
| 24            | 6             | 0           | -0.096363               | -1.894554 | -2.241084 |
| 25            | 6             | 0           | -4.883925               | -1.829399 | -1.351963 |
| 26            | 6             | 0           | -2.765728               | -2.967887 | -1.899436 |
| 27            | 6             | 0           | -5.521964               | 0.269541  | -0.514394 |
| 28            | 6             | 0           | -4.586114               | -0.836135 | -2.362363 |
| 29            | 6             | 0           | -2.513902               | -2.052690 | -2.905619 |
| 30            | 6             | 0           | 0.401665                | 0.397240  | 2.812891  |
| 31            | 6             | 0           | -5.032227               | 0.748850  | 1.856678  |
| 32            | 6             | 0           | 1.486393                | -1.702433 | 0.094714  |
| 33            | 6             | 0           | -4.944630               | 0.470192  | -1.828308 |
| 34            | 6             | 0           | -3.448819               | -0.963909 | -3.153068 |
| 35            | 6             | 0           | -1.171952               | -1.556082 | -3.084454 |
| 36            | 6             | 0           | -1.290122               | -0.205382 | -3.549524 |
| 37            | 6             | 0           | 1.063938                | -1.000973 | -2.185386 |
| 38            | 6             | 0           | 1.750803                | -0.904261 | 1.173730  |
| 39            | 6             | 0           | 2.220184                | 1.522164  | 1.446651  |
| 40            | 6             | 0           | -2.658363               | 0.201398  | -3.481503 |
| 41            | 6             | 0           | -2.935315               | 1.437421  | -2.886764 |
| 42            | 6             | 0           | -1.887104               | 2.339871  | -2.432764 |
| 43            | 6             | 0           | -4.103433               | 1.563186  | -2.055520 |
| 44            | 6             | 0           | -4.050459               | 1.631476  | 2.451224  |
| 45            | 6             | 0           | 1.805852                | 1.534888  | -2.798687 |
| 46            | 6             | 0           | -5.274695               | 1.198517  | 0.494017  |
| 47            | 6             | 0           | -4.407769               | 2.335365  | 0.237139  |
| 48            | 6             | 0           | 0.984297                | 0.265294  | -2.763204 |
| 49            | 6             | 0           | 0.852298                | 1.536963  | 2.045637  |
| 50            | 6             | 0           | -0.077584               | 2.507843  | 1.692213  |
| 51            | 6             | 0           | -0.300801               | 0.700311  | -3.259168 |
| 52            | 6             | 0           | -0.584939               | 2.062513  | -2.864746 |
| 53            | 6             | 0           | -3.788659               | 2.500229  | -1.004508 |
| 54            | 6             | 0           | -2.396658               | 2.944494  | -1.149262 |
| 55            | 6             | 0           | 0.750831                | 2.711655  | -2.867828 |
| 56            | 6             | 0           | -3.666388               | 2.606092  | 1.437358  |
| 57            | 6             | 0           | -1.368449               | 2.520043  | 2.270460  |
| 58            | 6             | 0           | -0.209557               | 3.052045  | 0.283909  |
| 59            | 6             | 0           | -2.344022               | 3.004812  | 1.310347  |
| 60            | 6             | 0           | -1.696641               | 3.211300  | 0.033728  |
| 61            | 6             | 0           | 2.186873                | -1.452617 | -1.230346 |
| 62            | 6             | 0           | 2.869743                | 0.125587  | 1.188283  |
| 63            | 6             | 0           | 3.647972                | 0.148081  | -0.155549 |
| 64            | 7             | 0           | 3.272342                | -0.506480 | -1.188714 |
| 65            | 6             | 0           | 3.789587                | -0.304387 | 2.355533  |
| 66            | 6             | 0           | 2.864290                | -2.750739 | -1.730643 |
| 67            | 8             | 0           | 2.802137                | 2.568147  | 1.238145  |
| 68            | 8             | 0           | 2.990585                | 1.721396  | -2.902023 |
| 69            | 6             | 0           | 3.019396                | -3.016814 | -3.093296 |
| 70            | 6             | 0           | 3.708640                | -4.166591 | -3.471961 |
| 71            | 6             | 0           | 4.221058                | -5.002952 | -2.479915 |
| 72            | 6             | 0           | 4.025192                | -4.640082 | -1.147353 |
| 73            | 7             | 0           | 3.363841                | -3.538572 | -0.772703 |
| 74            | 6             | 0           | 4.491195                | -1.509542 | 2.216697  |
| 75            | 6             | 0           | 5.302528                | -1.971902 | 3.250857  |
| 76            | 6             | 0           | 5.412815                | -1.245736 | 4.439137  |
| 77            | 6             | 0           | 4.702484                | -0.054397 | 4.586392  |
| 78            | 6             | 0           | 3.891830                | 0.414422  | 3.550543  |
| 79            | 8             | 0           | 0.667177                | 2.999002  | -0.558856 |
| 80            | 8             | 0           | 1.045911                | 3.863100  | -3.119652 |
| 81            | 8             | 0           | 0.218269                | 5.378972  | 1.029997  |
| 82            | 6             | 0           | 4.920522                | 0.923794  | -0.308430 |
| 83            | 6             | 0           | 5.518133                | 1.678568  | 0.713754  |
| 84            | 6             | 0           | 6.728790                | 2.336930  | 0.503470  |
| 85            | 6             | 0           | 7.369160                | 2.261836  | -0.732402 |
| 86            | 6             | 0           | 6.784807                | 1.518864  | -1.761210 |
| 87            | 6             | 0           | 5.581255                | 0.856419  | -1.551352 |
| 88            | 1             | 0           | 2.613388                | -2.335038 | -3.832844 |
| 89            | 1             | 0           | 3.844692                | -4.404043 | -4.523481 |
| 90            | 1             | 0           | 4.762809                | -5.910207 | -2.728904 |
| 91            | 1             | 0           | 4.415626                | -5.258027 | -0.340909 |
| 92            | 1             | 0           | 4.383058                | -2.091577 | 1.304593  |
| 93            | 1             | 0           | 5.847029                | -2.904279 | 3.128307  |
| 94            | 1             | 0           | 6.045549                | -1.607599 | 5.244862  |
| 95            | 1             | 0           | 4.777979                | 0.517479  | 5.507231  |
| 96            | 1             | 0           | 3.360480                | 1.352886  | 3.675637  |
| 97            | 1             | 0           | 0.054322                | 5.111757  | -2.187495 |

|     |   |   |          |          |           |     |   |   |           |          |           |
|-----|---|---|----------|----------|-----------|-----|---|---|-----------|----------|-----------|
| 98  | 1 | 0 | 1.146451 | 5.095330 | 0.997532  | 104 | 8 | 0 | -0.451538 | 5.751567 | -1.642439 |
| 99  | 1 | 0 | 5.046927 | 1.769831 | 1.678917  | 105 | 1 | 0 | 0.014546  | 5.622385 | 0.095479  |
| 100 | 1 | 0 | 7.167454 | 2.912909 | 1.313782  | 106 | 1 | 0 | -0.261723 | 6.613405 | -2.041210 |
| 101 | 1 | 0 | 8.312200 | 2.777842 | -0.894072 |     |   |   |           |          |           |
| 102 | 1 | 0 | 7.267874 | 1.456420 | -2.732719 |     |   |   |           |          |           |
| 103 | 1 | 0 | 5.120910 | 0.287248 | -2.347432 |     |   |   |           |          |           |

-----

The total electronic energy was calculated to be -3620.1410692 Hartree.

**Table S4.** Optimized structure of **1B•(H<sub>2</sub>O)<sub>2</sub>** (B3LYP-D3/6-31G(d))

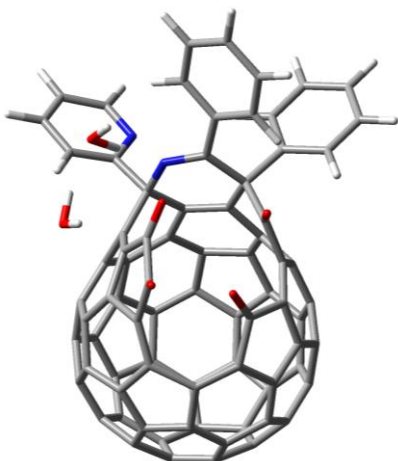

Standard orientation:

| Center Number | Atomic Number | Atomic Type | Coordinates (Angstroms) |           |           |
|---------------|---------------|-------------|-------------------------|-----------|-----------|
|               |               |             | X                       | Y         | Z         |
| 1             | 6             | 0           | -3.803265               | 0.269658  | -3.164919 |
| 2             | 6             | 0           | -2.392717               | 0.167875  | -3.500309 |
| 3             | 6             | 0           | -1.751236               | -1.055805 | -3.394407 |
| 4             | 6             | 0           | -2.470329               | -2.226921 | -2.924639 |
| 5             | 6             | 0           | -3.812697               | -2.124687 | -2.562599 |
| 6             | 6             | 0           | -4.494500               | -0.847780 | -2.687714 |
| 7             | 6             | 0           | -1.716640               | 1.376218  | -3.062854 |
| 8             | 6             | 0           | -0.408380               | -1.102085 | -2.881874 |
| 9             | 6             | 0           | -1.549379               | -2.987348 | -2.108901 |
| 10            | 6             | 0           | -4.283207               | -2.773786 | -1.350301 |
| 11            | 6             | 0           | -5.392954               | -0.709148 | -1.554459 |
| 12            | 6             | 0           | -4.019208               | 1.571134  | -2.568421 |
| 13            | 6             | 0           | -3.388831               | -3.504121 | -0.561720 |
| 14            | 6             | 0           | -1.993324               | -3.614152 | -0.951311 |
| 15            | 6             | 0           | -3.429452               | -3.374872 | 0.880863  |
| 16            | 6             | 0           | -1.169869               | -3.541596 | 0.237557  |
| 17            | 6             | 0           | -0.418240               | 1.338089  | -2.505204 |
| 18            | 6             | 0           | -0.268400               | -2.316626 | -2.104984 |
| 19            | 6             | 0           | -2.061629               | -3.398045 | 1.360055  |
| 20            | 6             | 0           | 0.582744                | -2.334157 | -1.001886 |
| 21            | 6             | 0           | 0.267413                | 0.053007  | -2.475455 |
| 22            | 6             | 0           | -5.251926               | -1.892693 | -0.721736 |
| 23            | 6             | 0           | -5.588425               | 0.541907  | -0.965564 |
| 24            | 6             | 0           | -0.071111               | 2.291427  | -1.435820 |
| 25            | 6             | 0           | -4.905935               | 1.711477  | -1.493104 |
| 26            | 6             | 0           | -2.745547               | 2.262026  | -2.548108 |
| 27            | 6             | 0           | -5.627645               | 0.665857  | 0.481591  |
| 28            | 6             | 0           | -4.558951               | 2.571149  | -0.380226 |
| 29            | 6             | 0           | -2.438133               | 3.119308  | -1.506650 |
| 30            | 6             | 0           | 0.094022                | -2.919632 | 0.244222  |
| 31            | 6             | 0           | -5.287822               | -1.770684 | 0.672200  |
| 32            | 6             | 0           | 1.388729                | -0.117346 | -1.588263 |
| 33            | 6             | 0           | -4.974413               | 1.907767  | 0.846714  |
| 34            | 6             | 0           | -3.367417               | 3.289669  | -0.398920 |
| 35            | 6             | 0           | -1.094596               | 3.140548  | -0.984323 |
| 36            | 6             | 0           | -1.196470               | 3.420567  | 0.417738  |
| 37            | 6             | 0           | 1.068358                | 2.026145  | -0.548872 |
| 38            | 6             | 0           | 1.576298                | -1.287802 | -0.907650 |
| 39            | 6             | 0           | 1.937309                | -1.698589 | 1.504715  |
| 40            | 6             | 0           | -2.572950               | 3.414824  | 0.803176  |
| 41            | 6             | 0           | -2.917918               | 2.704251  | 1.957729  |
| 42            | 6             | 0           | -1.924764               | 2.086353  | 2.820873  |
| 43            | 6             | 0           | -4.143191               | 1.947941  | 1.968917  |
| 44            | 6             | 0           | -4.353098               | -2.521501 | 1.483951  |
| 45            | 6             | 0           | 1.770762                | 2.063435  | 2.070378  |
| 46            | 6             | 0           | -5.462413               | -0.461250 | 1.283895  |
| 47            | 6             | 0           | -4.607595               | -0.396538 | 2.456903  |
| 48            | 6             | 0           | 0.995177                | 2.371418  | 0.798200  |
| 49            | 6             | 0           | 0.564885                | -2.294130 | 1.467253  |
| 50            | 6             | 0           | -0.352587               | -2.052243 | 2.494045  |
| 51            | 6             | 0           | -0.248886               | 2.928321  | 1.281303  |
| 52            | 6             | 0           | -0.587428               | 2.426851  | 2.591811  |
| 53            | 6             | 0           | -3.921574               | 0.777670  | 2.782450  |
| 54            | 6             | 0           | -2.539199               | 0.784448  | 3.276447  |
| 55            | 6             | 0           | 0.751918                | 2.294319  | 3.241575  |
| 56            | 6             | 0           | -3.939795               | -1.662840 | 2.584592  |
| 57            | 6             | 0           | -1.671454               | -2.574481 | 2.410051  |
| 58            | 6             | 0           | -0.445101               | -0.795659 | 3.361405  |
| 59            | 6             | 0           | -2.622837               | -1.659664 | 3.017165  |
| 60            | 6             | 0           | -1.925022               | -0.464697 | 3.420989  |
| 61            | 6             | 0           | 2.145663                | 1.130665  | -1.183023 |
| 62            | 6             | 0           | 2.662166                | -1.470917 | 0.135671  |
| 63            | 6             | 0           | 3.591923                | -0.232382 | 0.196012  |
| 64            | 7             | 0           | 3.280888                | 0.899438  | -0.315278 |
| 65            | 6             | 0           | 3.482042                | -2.715882 | -0.267899 |
| 66            | 6             | 0           | 2.788538                | 1.811097  | -2.413612 |
| 67            | 8             | 0           | 2.473026                | -1.457604 | 2.567051  |
| 68            | 8             | 0           | 2.358248                | 4.643530  | 2.088997  |
| 69            | 6             | 0           | 3.085872                | 3.176831  | -2.407023 |
| 70            | 6             | 0           | 3.744695                | 3.713486  | -3.510226 |
| 71            | 6             | 0           | 4.081753                | 2.871316  | -4.570847 |
| 72            | 6             | 0           | 3.754109                | 1.519349  | -4.470525 |
| 73            | 7             | 0           | 3.124235                | 0.990278  | -3.413855 |
| 74            | 6             | 0           | 4.092365                | -2.703068 | -1.530307 |
| 75            | 6             | 0           | 4.849406                | -3.791436 | -1.956590 |
| 76            | 6             | 0           | 4.998293                | -4.909942 | -1.132156 |
| 77            | 6             | 0           | 4.387579                | -4.928269 | 0.121088  |
| 78            | 6             | 0           | 3.633035                | -3.835011 | 0.553685  |
| 79            | 8             | 0           | 0.454535                | -0.124015 | 3.809233  |
| 80            | 8             | 0           | 1.062959                | 2.549244  | 4.378652  |
| 81            | 6             | 0           | 6.639539                | -1.164157 | 2.319926  |
| 82            | 6             | 0           | 5.333526                | -1.164796 | 1.832748  |
| 83            | 6             | 0           | 4.962967                | -0.309872 | 0.783971  |
| 84            | 6             | 0           | 5.949634                | 0.524888  | 0.222532  |
| 85            | 6             | 0           | 7.253506                | 0.521317  | 0.709564  |
| 86            | 6             | 0           | 7.604562                | -0.323725 | 1.764670  |
| 87            | 1             | 0           | 2.827008                | 3.793844  | -1.553642 |
| 88            | 1             | 0           | 3.993769                | 4.770435  | -3.537529 |
| 89            | 1             | 0           | 4.592795                | 3.248534  | -5.451361 |
| 90            | 1             | 0           | 4.008508                | 0.825607  | -5.269698 |
| 91            | 1             | 0           | 3.970122                | -1.835724 | -2.175318 |

|     |   |   |          |           |           |     |   |   |          |          |          |
|-----|---|---|----------|-----------|-----------|-----|---|---|----------|----------|----------|
| 92  | 1 | 0 | 5.323029 | -3.766099 | -2.934152 | 101 | 8 | 0 | 2.900358 | 1.692057 | 2.274937 |
| 93  | 1 | 0 | 5.587616 | -5.759738 | -1.465191 | 102 | 1 | 0 | 4.025721 | 2.553545 | 0.283234 |
| 94  | 1 | 0 | 4.498502 | -5.792051 | 0.770805  | 103 | 1 | 0 | 2.648481 | 4.439556 | 2.991647 |
| 95  | 1 | 0 | 3.180743 | -3.859612 | 1.540085  | 104 | 8 | 0 | 4.424476 | 3.413740 | 0.556652 |
| 96  | 1 | 0 | 6.899263 | -1.823531 | 3.143450  | 105 | 1 | 0 | 3.096292 | 4.316489 | 1.523928 |
| 97  | 1 | 0 | 4.597212 | -1.802725 | 2.295938  | 106 | 1 | 0 | 5.000140 | 3.139644 | 1.287988 |
| 98  | 1 | 0 | 5.684623 | 1.173828  | -0.604364 |     |   |   |          |          |          |
| 99  | 1 | 0 | 7.997173 | 1.171638  | 0.256795  |     |   |   |          |          |          |
| 100 | 1 | 0 | 8.622349 | -0.330925 | 2.145758  |     |   |   |          |          |          |

The total electronic energy was calculated to be -3620.1472889 Hartree.

**Table S5.** Optimized structure of TS1 (B3LYP-D3/6-31G(d))

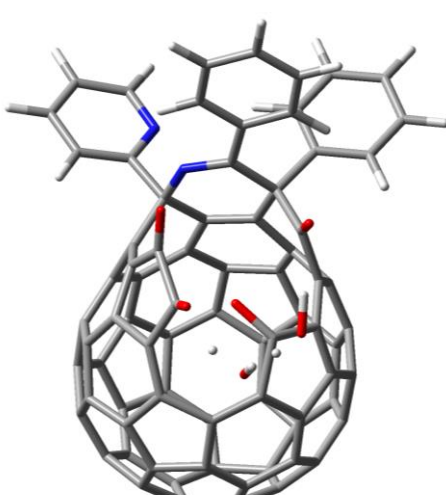

Standard orientation:

| Center Number | Atomic Number | Atomic Type | Coordinates (Angstroms) |           |           |
|---------------|---------------|-------------|-------------------------|-----------|-----------|
|               |               |             | X                       | Y         | Z         |
| 1             | 6             | 0           | -3.716697               | -3.284507 | 0.162740  |
| 2             | 6             | 0           | -2.303721               | -3.622187 | 0.206906  |
| 3             | 6             | 0           | -1.583010               | -3.401586 | 1.369189  |
| 4             | 6             | 0           | -2.221670               | -2.817178 | 2.535398  |
| 5             | 6             | 0           | -3.566264               | -2.449477 | 2.482028  |
| 6             | 6             | 0           | -4.329616               | -2.689230 | 1.268876  |
| 7             | 6             | 0           | -1.706018               | -3.315325 | -1.079867 |
| 8             | 6             | 0           | -0.240330               | -2.895091 | 1.277055  |
| 9             | 6             | 0           | -1.248091               | -1.949267 | 3.159917  |
| 10            | 6             | 0           | -3.983574               | -1.172396 | 3.035158  |
| 11            | 6             | 0           | -5.225181               | -1.561352 | 1.074486  |
| 12            | 6             | 0           | -4.014559               | -2.820347 | -1.175461 |
| 13            | 6             | 0           | -3.037995               | -0.331463 | 3.628963  |
| 14            | 6             | 0           | -1.644308               | -0.733237 | 3.703112  |
| 15            | 6             | 0           | -3.064390               | 1.092036  | 3.354780  |
| 16            | 6             | 0           | -0.809530               | 0.430540  | 3.489508  |
| 17            | 6             | 0           | -0.407724               | -2.767434 | -1.183536 |
| 18            | 6             | 0           | -0.012003               | -2.021498 | 2.408210  |
| 19            | 6             | 0           | -1.692737               | 1.547234  | 3.264469  |
| 20            | 6             | 0           | 0.854722                | -0.938136 | 2.282045  |
| 21            | 6             | 0           | 0.358000                | -2.601181 | 0.046314  |
| 22            | 6             | 0           | -4.996415               | -0.616222 | 2.155567  |
| 23            | 6             | 0           | -5.496758               | -1.098135 | -0.214470 |
| 24            | 6             | 0           | -0.117094               | -1.822947 | -2.276649 |
| 25            | 6             | 0           | -4.901104               | -1.752941 | -1.366999 |
| 26            | 6             | 0           | -2.789214               | -2.885781 | -1.947404 |
| 27            | 6             | 0           | -5.529344               | 0.329440  | -0.482878 |
| 28            | 6             | 0           | -4.607035               | -0.740107 | -2.360406 |
| 29            | 6             | 0           | -2.536835               | -1.947624 | -2.931834 |
| 30            | 6             | 0           | 0.425005                | 0.352772  | 2.816379  |
| 31            | 6             | 0           | -5.017585               | 0.758821  | 1.892172  |
| 32            | 6             | 0           | 1.483367                | -1.701735 | 0.057465  |
| 33            | 6             | 0           | -4.963183               | 0.554549  | -1.798927 |
| 34            | 6             | 0           | -3.469780               | -0.852339 | -3.155837 |
| 35            | 6             | 0           | -1.193404               | -1.450291 | -3.105194 |
| 36            | 6             | 0           | -1.307159               | -0.086645 | -3.537403 |
| 37            | 6             | 0           | 1.046622                | -0.939316 | -2.195339 |
| 38            | 6             | 0           | 1.757356                | -0.925085 | 1.149449  |
| 39            | 6             | 0           | 2.217396                | 1.497556  | 1.423493  |
| 40            | 6             | 0           | -2.679492               | 0.316805  | -3.470913 |
| 41            | 6             | 0           | -2.966929               | 1.544305  | -2.861788 |
| 42            | 6             | 0           | -1.918737               | 2.425981  | -2.381033 |
| 43            | 6             | 0           | -4.126802               | 1.653405  | -2.015218 |
| 44            | 6             | 0           | -4.020684               | 1.622663  | 2.490095  |
| 45            | 6             | 0           | 1.762472                | 1.626374  | -2.564877 |
| 46            | 6             | 0           | -5.272665               | 1.236907  | 0.542595  |
| 47            | 6             | 0           | -4.404652               | 2.377806  | 0.301686  |
| 48            | 6             | 0           | 0.959943                | 0.350922  | -2.707721 |
| 49            | 6             | 0           | 0.875300                | 1.500454  | 2.063329  |
| 50            | 6             | 0           | -0.058352               | 2.462521  | 1.709975  |
| 51            | 6             | 0           | -0.312075               | 0.809484  | -3.210737 |
| 52            | 6             | 0           | -0.611198               | 2.139915  | -2.746939 |
| 53            | 6             | 0           | -3.799015               | 2.564000  | -0.941817 |
| 54            | 6             | 0           | -2.407313               | 3.001306  | -1.085799 |
| 55            | 6             | 0           | 0.692183                | 2.767336  | -2.381130 |
| 56            | 6             | 0           | -3.642234               | 2.616799  | 1.492249  |
| 57            | 6             | 0           | -1.337825               | 2.491507  | 2.298345  |
| 58            | 6             | 0           | -0.137229               | 3.087594  | 0.299297  |
| 59            | 6             | 0           | -2.312814               | 3.007988  | 1.357273  |
| 60            | 6             | 0           | -1.677512               | 3.246633  | 0.080298  |
| 61            | 6             | 0           | 2.174341                | -1.431320 | -1.266313 |
| 62            | 6             | 0           | 2.876202                | 0.108114  | 1.169020  |
| 63            | 6             | 0           | 3.654645                | 0.136626  | -0.173236 |
| 64            | 7             | 0           | 3.277059                | -0.505042 | -1.212257 |
| 65            | 6             | 0           | 3.796406                | -0.322937 | 2.334405  |
| 66            | 6             | 0           | 2.828202                | -2.727135 | -1.801341 |
| 67            | 8             | 0           | 2.774421                | 2.552219  | 1.163071  |
| 68            | 8             | 0           | 2.936082                | 1.847507  | -2.710309 |
| 69            | 6             | 0           | 2.925325                | -2.992600 | -3.169304 |
| 70            | 6             | 0           | 3.598202                | -4.141950 | -3.578105 |
| 71            | 6             | 0           | 4.152604                | -4.979094 | -2.609905 |
| 72            | 6             | 0           | 4.013026                | -4.617357 | -1.269760 |
| 73            | 7             | 0           | 3.368557                | -3.516544 | -0.866167 |
| 74            | 6             | 0           | 4.506986                | -1.521946 | 2.188443  |
| 75            | 6             | 0           | 5.320578                | -1.985045 | 3.220424  |
| 76            | 6             | 0           | 5.424819                | -1.265758 | 4.413570  |
| 77            | 6             | 0           | 4.705828                | -0.080600 | 4.567966  |
| 78            | 6             | 0           | 3.892704                | 0.388574  | 3.534186  |
| 79            | 8             | 0           | 0.558825                | 2.383018  | -0.559996 |
| 80            | 8             | 0           | 1.023882                | 3.960765  | -2.592833 |
| 81            | 8             | 0           | 0.456787                | 4.538629  | 0.463437  |
| 82            | 6             | 0           | 4.926598                | 0.915160  | -0.320091 |
| 83            | 6             | 0           | 5.518695                | 1.668049  | 0.706165  |
| 84            | 6             | 0           | 6.726235                | 2.334032  | 0.500999  |
| 85            | 6             | 0           | 7.368288                | 2.268862  | -0.734698 |
| 86            | 6             | 0           | 6.787257                | 1.530324  | -1.768608 |
| 87            | 6             | 0           | 5.586332                | 0.861270  | -1.563542 |

|    |   |   |          |           |           |     |   |   |           |          |           |
|----|---|---|----------|-----------|-----------|-----|---|---|-----------|----------|-----------|
| 88 | 1 | 0 | 2.486611 | -2.311482 | -3.890308 | 99  | 1 | 0 | 5.045282  | 1.751222 | 1.671420  |
| 89 | 1 | 0 | 3.688947 | -4.378398 | -4.634790 | 100 | 1 | 0 | 7.162041  | 2.906841 | 1.315307  |
| 90 | 1 | 0 | 4.683337 | -5.886136 | -2.882501 | 101 | 1 | 0 | 8.309646  | 2.789324 | -0.892322 |
| 91 | 1 | 0 | 4.437221 | -5.236516 | -0.481359 | 102 | 1 | 0 | 7.270719  | 1.476952 | -2.740530 |
| 92 | 1 | 0 | 4.403318 | -2.098198 | 1.272003  | 103 | 1 | 0 | 5.126333  | 0.296959 | -2.363637 |
| 93 | 1 | 0 | 5.871399 | -2.913014 | 3.092701  | 104 | 8 | 0 | -0.245545 | 5.744233 | -1.508399 |
| 94 | 1 | 0 | 6.059121 | -1.628624 | 5.217649  | 105 | 1 | 0 | 0.147820  | 5.212792 | -0.461713 |
| 95 | 1 | 0 | 4.775785 | 0.485292  | 5.493014  | 106 | 1 | 0 | 0.238590  | 6.570956 | -1.670109 |
| 96 | 1 | 0 | 3.351174 | 1.320588  | 3.665277  |     |   |   |           |          |           |
| 97 | 1 | 0 | 0.179544 | 5.014168  | -2.159407 |     |   |   |           |          |           |
| 98 | 1 | 0 | 1.421479 | 4.354205  | 0.485013  |     |   |   |           |          |           |

The total electronic energy was calculated to be -3620.1212434 Hartree.

An imaginary frequency was found at -703.30 cm<sup>-1</sup>.

**Table S6.** Optimized structure of TS2 (B3LYP-D3/6-31G(d))

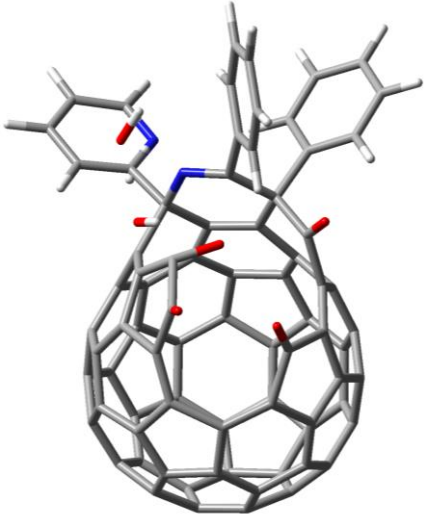

Standard orientation:

| Center Number | Atomic Number | Atomic Type | Coordinates (Angstroms) |           |           |
|---------------|---------------|-------------|-------------------------|-----------|-----------|
|               |               |             | X                       | Y         | Z         |
| 1             | 6             | 0           | 3.853640                | 2.876979  | 1.273938  |
| 2             | 6             | 0           | 2.447136                | 3.139856  | 1.529191  |
| 3             | 6             | 0           | 1.797085                | 2.451547  | 2.540975  |
| 4             | 6             | 0           | 2.503700                | 1.461852  | 3.333865  |
| 5             | 6             | 0           | 3.844197                | 1.182274  | 3.070017  |
| 6             | 6             | 0           | 4.533274                | 1.905568  | 2.015090  |
| 7             | 6             | 0           | 1.772151                | 3.368783  | 0.263731  |
| 8             | 6             | 0           | 0.451335                | 1.992345  | 2.324272  |
| 9             | 6             | 0           | 1.570868                | 0.388740  | 3.597380  |
| 10            | 6             | 0           | 4.301752                | -0.196814 | 3.049008  |
| 11            | 6             | 0           | 5.420496                | 0.972734  | 1.341434  |
| 12            | 6             | 0           | 4.067508                | 2.989127  | -0.153081 |
| 13            | 6             | 0           | 3.397772                | -1.231741 | 3.307034  |
| 14            | 6             | 0           | 2.004925                | -0.930283 | 3.588845  |
| 15            | 6             | 0           | 3.425557                | -2.434018 | 2.498791  |
| 16            | 6             | 0           | 1.173786                | -1.932062 | 2.958469  |
| 17            | 6             | 0           | 0.462178                | 2.894934  | 0.024981  |
| 18            | 6             | 0           | 0.298046                | 0.719327  | 2.994838  |
| 19            | 6             | 0           | 2.054482                | -2.858719 | 2.296368  |
| 20            | 6             | 0           | -0.552339               | -0.249435 | 2.460018  |
| 21            | 6             | 0           | -0.225674               | 2.224469  | 1.124440  |
| 22            | 6             | 0           | 5.266935                | -0.329123 | 1.971526  |
| 23            | 6             | 0           | 5.609681                | 1.063832  | -0.039421 |
| 24            | 6             | 0           | 0.099815                | 2.455967  | -1.333621 |
| 25            | 6             | 0           | 4.937784                | 2.103545  | -0.801537 |
| 26            | 6             | 0           | 2.798439                | 3.335276  | -0.764361 |
| 27            | 6             | 0           | 5.626329                | -0.141568 | -0.850334 |
| 28            | 6             | 0           | 4.572509                | 1.552704  | -2.090348 |
| 29            | 6             | 0           | 2.478290                | 2.849292  | -2.019894 |
| 30            | 6             | 0           | -0.084084               | -1.630902 | 2.404294  |
| 31            | 6             | 0           | 5.284280                | -1.488807 | 1.187437  |
| 32            | 6             | 0           | -1.352129               | 1.372958  | 0.833946  |
| 33            | 6             | 0           | 4.964507                | 0.151334  | -2.106478 |
| 34            | 6             | 0           | 3.385581                | 1.939881  | -2.704206 |
| 35            | 6             | 0           | 1.122438                | 2.441219  | -2.296794 |
| 36            | 6             | 0           | 1.197246                | 1.337310  | -3.211372 |
| 37            | 6             | 0           | -1.060453               | 1.580282  | -1.527104 |
| 38            | 6             | 0           | -1.525749               | 0.178073  | 1.479981  |
| 39            | 6             | 0           | -2.016067               | -2.224559 | 0.910967  |
| 40            | 6             | 0           | 2.566255                | 0.962885  | -3.387366 |
| 41            | 6             | 0           | 2.886827                | -0.398163 | -3.319581 |
| 42            | 6             | 0           | 1.878239                | -1.432852 | -3.177544 |
| 43            | 6             | 0           | 4.109774                | -0.796270 | -2.674499 |
| 44            | 6             | 0           | 4.341883                | -2.555115 | 1.455057  |
| 45            | 6             | 0           | -1.743476               | -0.802999 | -2.558803 |
| 46            | 6             | 0           | 5.449490                | -1.388595 | -0.255297 |
| 47            | 6             | 0           | 4.576531                | -2.372373 | -0.874526 |
| 48            | 6             | 0           | -1.004906               | 0.550766  | -2.458002 |
| 49            | 6             | 0           | -0.579221               | -2.421510 | 1.292468  |
| 50            | 6             | 0           | 0.321234                | -3.216503 | 0.589490  |
| 51            | 6             | 0           | 0.225001                | 0.360350  | -3.189238 |
| 52            | 6             | 0           | 0.550884                | -1.042246 | -3.341828 |
| 53            | 6             | 0           | 3.873518                | -2.072746 | -2.045088 |
| 54            | 6             | 0           | 2.484146                | -2.487165 | -2.275689 |
| 55            | 6             | 0           | -0.787505               | -1.686029 | -3.420883 |
| 56            | 6             | 0           | 3.911517                | -3.093211 | 0.172723  |
| 57            | 6             | 0           | 1.651035                | -3.374194 | 1.071504  |
| 58            | 6             | 0           | 0.391774                | -3.474289 | -0.917474 |
| 59            | 6             | 0           | 2.589902                | -3.463623 | -0.031539 |
| 60            | 6             | 0           | 1.874993                | -3.236581 | -1.264185 |
| 61            | 6             | 0           | -2.131019               | 1.704557  | -0.420183 |
| 62            | 6             | 0           | -2.630022               | -0.797788 | 1.122374  |
| 63            | 6             | 0           | -3.421767               | -0.327915 | -0.118057 |
| 64            | 7             | 0           | -3.287380               | 0.849519  | -0.642325 |
| 65            | 6             | 0           | -3.653001               | -0.785585 | 2.298408  |
| 66            | 6             | 0           | -2.726931               | 3.124325  | -0.346540 |
| 67            | 8             | 0           | -2.691141               | -3.183344 | 0.602730  |
| 68            | 8             | 0           | -2.941267               | -0.547876 | -3.615548 |
| 69            | 6             | 0           | -2.913934               | 3.895445  | -1.496204 |
| 70            | 6             | 0           | -3.542792               | 5.133129  | -1.372960 |
| 71            | 6             | 0           | -3.960578               | 5.553314  | -0.110670 |
| 72            | 6             | 0           | -3.737762               | 4.703652  | 0.973825  |
| 73            | 7             | 0           | -3.138727               | 3.512496  | 0.866673  |
| 74            | 6             | 0           | -4.066588               | 0.465726  | 2.785320  |
| 75            | 6             | 0           | -5.013811               | 0.550857  | 3.803974  |
| 76            | 6             | 0           | -5.559517               | -0.609109 | 4.357297  |
| 77            | 6             | 0           | -5.154913               | -1.852436 | 3.873677  |

|    |   |   |           |           |           |     |   |   |           |           |           |
|----|---|---|-----------|-----------|-----------|-----|---|---|-----------|-----------|-----------|
| 78 | 6 | 0 | -4.213361 | -1.944275 | 2.845843  | 94  | 1 | 0 | -5.576110 | -2.763556 | 4.290065  |
| 79 | 8 | 0 | -0.486170 | -3.808113 | -1.670178 | 95  | 1 | 0 | -3.937467 | -2.919590 | 2.466907  |
| 80 | 8 | 0 | -1.144211 | -2.613977 | -4.111287 | 96  | 1 | 0 | -6.133991 | -3.671993 | -2.025439 |
| 81 | 6 | 0 | -6.072784 | -2.729996 | -1.487161 | 97  | 1 | 0 | -3.913109 | -2.748112 | -1.411237 |
| 82 | 6 | 0 | -4.818477 | -2.224181 | -1.141355 | 98  | 1 | 0 | -5.825377 | 0.622233  | 0.425702  |
| 83 | 6 | 0 | -4.725550 | -1.005895 | -0.455813 | 99  | 1 | 0 | -8.051566 | -0.285923 | -0.187347 |
| 84 | 6 | 0 | -5.901227 | -0.315466 | -0.115749 | 100 | 1 | 0 | -8.211209 | -2.441927 | -1.427903 |
| 85 | 6 | 0 | -7.151429 | -0.829263 | -0.461856 | 101 | 8 | 0 | -2.091812 | -1.443042 | -1.505105 |
| 86 | 6 | 0 | -7.239695 | -2.039394 | -1.153648 | 102 | 1 | 0 | -4.109627 | 1.077436  | -1.814090 |
| 87 | 1 | 0 | -2.579184 | 3.528684  | -2.460587 | 103 | 1 | 0 | -3.223776 | -1.455137 | -3.840407 |
| 88 | 1 | 0 | -3.702220 | 5.757078  | -2.247950 | 104 | 8 | 0 | -4.609457 | 0.986415  | -2.790102 |
| 89 | 1 | 0 | -4.449454 | 6.511849  | 0.033703  | 105 | 1 | 0 | -3.848199 | 0.166403  | -3.243141 |
| 90 | 1 | 0 | -4.053850 | 4.989153  | 1.975493  | 106 | 1 | 0 | -5.452996 | 0.546596  | -2.583682 |
| 91 | 1 | 0 | -3.658919 | 1.379010  | 2.360281  |     |   |   |           |           |           |
| 92 | 1 | 0 | -5.322594 | 1.528306  | 4.165334  |     |   |   |           |           |           |
| 93 | 1 | 0 | -6.294894 | -0.543621 | 5.154740  |     |   |   |           |           |           |

The total electronic energy was calculated to be  $-3620.1164999$  Hartree.

An imaginary frequency was found at  $-885.56$   $\text{cm}^{-1}$ .

**Table S7.** Optimized structure of  $2 \cdot \text{H}_2\text{O}$  (B3LYP-D3/6-31G(d))

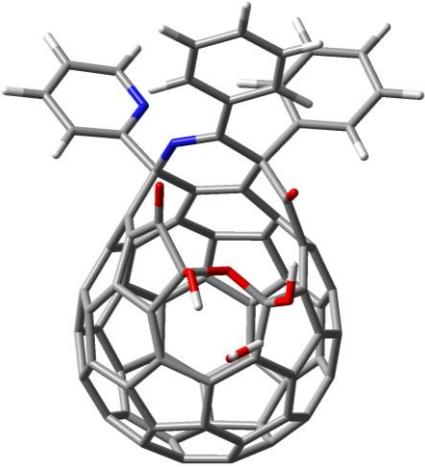

|    |   |   |           |           |           |
|----|---|---|-----------|-----------|-----------|
| 25 | 6 | 0 | 4.857626  | 1.836653  | -1.341943 |
| 26 | 6 | 0 | 2.729985  | 2.942384  | -1.918409 |
| 27 | 6 | 0 | 5.524061  | -0.240650 | -0.472962 |
| 28 | 6 | 0 | 4.580165  | 0.825980  | -2.342670 |
| 29 | 6 | 0 | 2.491278  | 2.004801  | -2.907867 |
| 30 | 6 | 0 | -0.433883 | -0.393627 | 2.773019  |
| 31 | 6 | 0 | 5.015862  | -0.697540 | 1.898167  |
| 32 | 6 | 0 | -1.534839 | 1.699911  | 0.063940  |
| 33 | 6 | 0 | 4.962789  | -0.465685 | -1.792030 |
| 34 | 6 | 0 | 3.439703  | 0.924215  | -3.135616 |
| 35 | 6 | 0 | 1.154546  | 1.490607  | -3.086794 |
| 36 | 6 | 0 | 1.286821  | 0.124601  | -3.516339 |
| 37 | 6 | 0 | -1.083022 | 0.965744  | -2.183442 |
| 38 | 6 | 0 | -1.792346 | 0.896041  | 1.139675  |
| 39 | 6 | 0 | -2.207465 | -1.542856 | 1.366408  |
| 40 | 6 | 0 | 2.666714  | -0.256060 | -3.455213 |
| 41 | 6 | 0 | 2.983895  | -1.483525 | -2.861000 |
| 42 | 6 | 0 | 1.951961  | -2.374811 | -2.364474 |
| 43 | 6 | 0 | 4.150022  | -1.579547 | -2.019066 |
| 44 | 6 | 0 | 4.032452  | -1.584853 | 2.484748  |
| 45 | 6 | 0 | -1.725841 | -1.618782 | -2.443960 |
| 46 | 6 | 0 | 5.286241  | -1.160989 | 0.546203  |
| 47 | 6 | 0 | 4.445290  | -2.319580 | 0.295492  |
| 48 | 6 | 0 | -0.965372 | -0.330503 | -2.664744 |
| 49 | 6 | 0 | -0.858575 | -1.539636 | 1.994824  |
| 50 | 6 | 0 | 0.087626  | -2.494721 | 1.650610  |
| 51 | 6 | 0 | 0.306786  | -0.783970 | -3.165076 |
| 52 | 6 | 0 | 0.632900  | -2.091406 | -2.664619 |
| 53 | 6 | 0 | 3.845779  | -2.506269 | -0.950734 |
| 54 | 6 | 0 | 2.466297  | -2.969037 | -1.093750 |
| 55 | 6 | 0 | -0.616747 | -2.669587 | -2.041474 |
| 56 | 6 | 0 | 3.681272  | -2.581331 | 1.481180  |
| 57 | 6 | 0 | 1.361748  | -2.500987 | 2.262718  |
| 58 | 6 | 0 | 0.194478  | -3.222880 | 0.282030  |
| 59 | 6 | 0 | 2.360743  | -3.000992 | 1.340241  |
| 60 | 6 | 0 | 1.740535  | -3.245949 | 0.061691  |
| 61 | 6 | 0 | -2.222299 | 1.440741  | -1.261711 |
| 62 | 6 | 0 | -2.891859 | -0.156985 | 1.144401  |
| 63 | 6 | 0 | -3.677425 | -0.168934 | -0.194010 |
| 64 | 7 | 0 | -3.314086 | 0.500282  | -1.221584 |
| 65 | 6 | 0 | -3.813261 | 0.232664  | 2.323374  |
| 66 | 6 | 0 | -2.884535 | 2.735920  | -1.784319 |
| 67 | 8 | 0 | -2.749008 | -2.598829 | 1.085143  |
| 68 | 8 | 0 | -2.875702 | -1.904627 | -2.639612 |
| 69 | 6 | 0 | -2.971174 | 3.022040  | -3.148662 |
| 70 | 6 | 0 | -3.651167 | 4.171574  | -3.545417 |
| 71 | 6 | 0 | -4.222855 | 4.987498  | -2.569236 |

Standard orientation:

| Center Number | Atomic Number | Atomic Type | Coordinates (Angstroms) |           |           |
|---------------|---------------|-------------|-------------------------|-----------|-----------|
|               |               |             | X                       | Y         | Z         |
| 1             | 6             | 0           | 3.648647                | 3.338889  | 0.196808  |
| 2             | 6             | 0           | 2.231526                | 3.658216  | 0.240678  |
| 3             | 6             | 0           | 1.510973                | 3.416857  | 1.399220  |
| 4             | 6             | 0           | 2.154541                | 2.827281  | 2.560314  |
| 5             | 6             | 0           | 3.504197                | 2.480233  | 2.507993  |
| 6             | 6             | 0           | 4.267740                | 2.743362  | 1.299509  |
| 7             | 6             | 0           | 1.640917                | 3.356288  | -1.050812 |
| 8             | 6             | 0           | 0.174924                | 2.894325  | 1.298200  |
| 9             | 6             | 0           | 1.192395                | 1.935571  | 3.169181  |
| 10            | 6             | 0           | 3.939587                | 1.204422  | 3.050475  |
| 11            | 6             | 0           | 5.181961                | 1.632191  | 1.098441  |
| 12            | 6             | 0           | 3.954863                | 2.888676  | -1.144293 |
| 13            | 6             | 0           | 3.004745                | 0.341262  | 3.630095  |
| 14            | 6             | 0           | 1.604373                | 0.718912  | 3.698154  |
| 15            | 6             | 0           | 3.057581                | -1.079048 | 3.343256  |
| 16            | 6             | 0           | 0.791721                | -0.456233 | 3.460195  |
| 17            | 6             | 0           | 0.347984                | 2.799034  | -1.163916 |
| 18            | 6             | 0           | -0.041094               | 1.998212  | 2.414765  |
| 19            | 6             | 0           | 1.693829                | -1.556198 | 3.234792  |
| 20            | 6             | 0           | -0.885801               | 0.899835  | 2.266685  |
| 21            | 6             | 0           | -0.419215               | 2.611894  | 0.063204  |
| 22            | 6             | 0           | 4.966541                | 0.674500  | 2.171095  |
| 23            | 6             | 0           | 5.463635                | 1.183650  | -0.193863 |
| 24            | 6             | 0           | 0.071553                | 1.859515  | -2.264870 |



|    |   |   |           |           |           |     |   |   |           |           |           |
|----|---|---|-----------|-----------|-----------|-----|---|---|-----------|-----------|-----------|
| 72 | 6 | 0 | -4.092591 | 4.605661  | -1.233672 | 91  | 1 | 0 | -4.530080 | 5.208104  | -0.439637 |
| 73 | 7 | 0 | -3.441054 | 3.504921  | -0.841597 | 92  | 1 | 0 | -4.455412 | 2.020296  | 1.303030  |
| 74 | 6 | 0 | -4.544353 | 1.422604  | 2.207284  | 93  | 1 | 0 | -5.927087 | 2.770113  | 3.149064  |
| 75 | 6 | 0 | -5.360144 | 1.848965  | 3.253245  | 94  | 1 | 0 | -6.082204 | 1.435836  | 5.245521  |
| 76 | 6 | 0 | -5.446114 | 1.101570  | 4.430552  | 95  | 1 | 0 | -4.762999 | -0.662191 | 5.467404  |
| 77 | 6 | 0 | -4.706936 | -0.074601 | 4.555058  | 96  | 1 | 0 | -3.334812 | -1.433178 | 3.614251  |
| 78 | 6 | 0 | -3.891559 | -0.507085 | 3.507140  | 97  | 1 | 0 | -0.231449 | -4.547792 | -2.366242 |
| 79 | 8 | 0 | -0.537251 | -2.424301 | -0.607899 | 98  | 1 | 0 | -1.263690 | -4.462424 | 0.413649  |
| 80 | 8 | 0 | -1.000449 | -3.924248 | -2.406693 | 99  | 1 | 0 | -5.037620 | -1.837584 | 1.623908  |
| 81 | 8 | 0 | -0.293391 | -4.551588 | 0.331753  | 100 | 1 | 0 | -7.127411 | -3.034261 | 1.244728  |
| 82 | 6 | 0 | -4.933002 | -0.969637 | -0.354735 | 101 | 1 | 0 | -8.271775 | -2.909313 | -0.963915 |
| 83 | 6 | 0 | -5.510667 | -1.750316 | 0.658839  | 102 | 1 | 0 | -7.257713 | -1.547813 | -2.790050 |
| 84 | 6 | 0 | -6.702699 | -2.439433 | 0.440515  | 103 | 1 | 0 | -5.141159 | -0.326451 | -2.390236 |
| 85 | 6 | 0 | -7.342848 | -2.370206 | -0.795904 | 104 | 8 | 0 | 0.899065  | -5.770007 | -1.842464 |
| 86 | 6 | 0 | -6.775755 | -1.604247 | -1.817593 | 105 | 1 | 0 | 0.563946  | -5.620559 | -0.932515 |
| 87 | 6 | 0 | -5.590271 | -0.912545 | -1.599452 | 106 | 1 | 0 | 0.534929  | -6.628281 | -2.109495 |
| 88 | 1 | 0 | -2.518768 | 2.357186  | -3.876440 |     |   |   |           |           |           |
| 89 | 1 | 0 | -3.733863 | 4.424508  | -4.598911 |     |   |   |           |           |           |
| 90 | 1 | 0 | -4.759546 | 5.893844  | -2.832278 |     |   |   |           |           |           |

The total electronic energy was calculated to be  $-3620.1626738$  Hartree.

**Table S8.** Optimized structure of **2** (B3LYP-D3/6-31G(d))

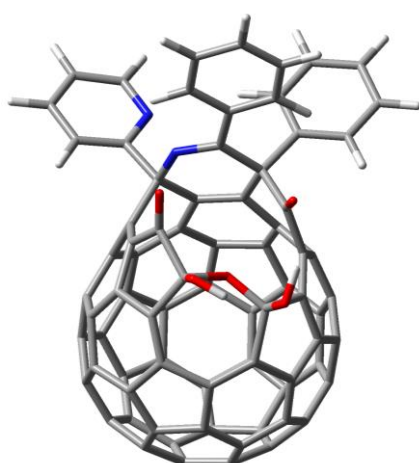

Standard orientation:

| Center Number | Atomic Number | Atomic Type | Coordinates (Angstroms) |           |          |
|---------------|---------------|-------------|-------------------------|-----------|----------|
|               |               |             | X                       | Y         | Z        |
| 1             | 6             | 0           | 3.716035                | 2.676170  | 1.711625 |
| 2             | 6             | 0           | 2.304136                | 2.947699  | 1.923590 |
| 3             | 6             | 0           | 1.583205                | 2.170452  | 2.815128 |
| 4             | 6             | 0           | 2.220884                | 1.073476  | 3.522252 |
| 5             | 6             | 0           | 3.564471                | 0.782140  | 3.288717 |
| 6             | 6             | 0           | 4.328534                | 1.602964  | 2.364231 |
| 7             | 6             | 0           | 1.705292                | 3.337948  | 0.660408 |
| 8             | 6             | 0           | 0.238674                | 1.784222  | 2.481289 |
| 9             | 6             | 0           | 1.246637                | 0.008945  | 3.618346 |
| 10            | 6             | 0           | 3.981831                | -0.599141 | 3.119943 |
| 11            | 6             | 0           | 5.224587                | 0.728750  | 1.626729 |
| 12            | 6             | 0           | 4.010714                | 2.950147  | 0.321356 |
| 13            | 6             | 0           | 3.035800                | -1.624999 | 3.204847 |
| 14            | 6             | 0           | 1.642108                | -1.314935 | 3.468541 |
| 15            | 6             | 0           | 3.064312                | -2.714415 | 2.248105 |
| 16            | 6             | 0           | 0.809781                | -2.206589 | 2.687507 |
| 17            | 6             | 0           | 0.403202                | 2.927768  | 0.297663 |
| 18            | 6             | 0           | 0.012595                | 0.453817  | 3.005832 |
| 19            | 6             | 0           | 1.692977                | -3.059158 | 1.933432 |
| 20            | 6             | 0           | -0.850161               | -0.414748 | 2.340779 |
| 21            | 6             | 0           | -0.363587               | 2.161789  | 1.275483 |

|    |   |   |           |           |           |
|----|---|---|-----------|-----------|-----------|
| 22 | 6 | 0 | 4.997121  | -0.633428 | 2.082010  |
| 23 | 6 | 0 | 5.495498  | 0.980566  | 0.279964  |
| 24 | 6 | 0 | 0.108884  | 2.668232  | -1.122415 |
| 25 | 6 | 0 | 4.896251  | 2.126482  | -0.383962 |
| 26 | 6 | 0 | 2.785021  | 3.398407  | -0.309505 |
| 27 | 6 | 0 | 5.530255  | -0.115974 | -0.672237 |
| 28 | 6 | 0 | 4.599725  | 1.753278  | -1.752239 |
| 29 | 6 | 0 | 2.528410  | 3.084512  | -1.632405 |
| 30 | 6 | 0 | -0.418229 | -1.795635 | 2.138483  |
| 31 | 6 | 0 | 5.022222  | -1.687306 | 1.161156  |
| 32 | 6 | 0 | -1.491327 | 1.382071  | 0.831842  |
| 33 | 6 | 0 | 4.961629  | 0.353631  | -1.922057 |
| 34 | 6 | 0 | 3.458435  | 2.248924  | -2.378446 |
| 35 | 6 | 0 | 1.182891  | 2.747278  | -2.031114 |
| 36 | 6 | 0 | 1.292363  | 1.776863  | -3.087794 |
| 37 | 6 | 0 | -1.061713 | 1.871299  | -1.487167 |
| 38 | 6 | 0 | -1.757879 | 0.152049  | 1.366851  |
| 39 | 6 | 0 | -2.211592 | -2.072726 | 0.362519  |
| 40 | 6 | 0 | 2.665492  | 1.396135  | -3.236023 |
| 41 | 6 | 0 | 2.963427  | 0.031117  | -3.334853 |
| 42 | 6 | 0 | 1.917239  | -0.972699 | -3.333401 |
| 43 | 6 | 0 | 4.129326  | -0.488107 | -2.664652 |
| 44 | 6 | 0 | 4.025476  | -2.735575 | 1.238782  |
| 45 | 6 | 0 | -1.746986 | -0.225211 | -2.998651 |
| 46 | 6 | 0 | 5.280405  | -1.418541 | -0.244685 |
| 47 | 6 | 0 | 4.418671  | -2.286743 | -1.029692 |
| 48 | 6 | 0 | -0.968643 | 0.992861  | -2.557119 |
| 49 | 6 | 0 | -0.864984 | -2.399464 | 0.901252  |
| 50 | 6 | 0 | 0.064698  | -3.065960 | 0.114962  |
| 51 | 6 | 0 | 0.297227  | 0.827491  | -3.225302 |
| 52 | 6 | 0 | 0.602949  | -0.560742 | -3.432435 |
| 53 | 6 | 0 | 3.812084  | -1.819689 | -2.196418 |
| 54 | 6 | 0 | 2.422501  | -2.129290 | -2.533591 |
| 55 | 6 | 0 | -0.648303 | -1.356866 | -3.128914 |
| 56 | 6 | 0 | 3.653195  | -3.093704 | -0.124039 |
| 57 | 6 | 0 | 1.341746  | -3.389634 | 0.623305  |
| 58 | 6 | 0 | 0.150134  | -2.991864 | -1.430058 |
| 59 | 6 | 0 | 2.325589  | -3.372411 | -0.439899 |
| 60 | 6 | 0 | 1.693579  | -2.934222 | -1.660918 |
| 61 | 6 | 0 | -2.189558 | 1.828118  | -0.438357 |
| 62 | 6 | 0 | -2.874298 | -0.750410 | 0.858407  |
| 63 | 6 | 0 | -3.659499 | -0.088625 | -0.306170 |
| 64 | 7 | 0 | -3.290220 | 1.001000  | -0.864979 |
| 65 | 6 | 0 | -3.790169 | -0.982806 | 2.082169  |

|    |   |   |           |           |           |     |   |   |           |           |           |
|----|---|---|-----------|-----------|-----------|-----|---|---|-----------|-----------|-----------|
| 66 | 6 | 0 | -2.839604 | 3.214759  | -0.227067 | 86  | 6 | 0 | -6.756983 | -0.517270 | -2.431826 |
| 67 | 8 | 0 | -2.763211 | -2.844035 | -0.406205 | 87  | 6 | 0 | -5.568936 | -0.030698 | -1.899520 |
| 68 | 8 | 0 | -2.893670 | -0.366101 | -3.324556 | 88  | 1 | 0 | -2.426432 | 3.979709  | -2.201174 |
| 69 | 6 | 0 | -2.893706 | 4.172438  | -1.241680 | 89  | 1 | 0 | -3.617518 | 6.137556  | -1.758641 |
| 70 | 6 | 0 | -3.560409 | 5.370467  | -0.991255 | 90  | 1 | 0 | -4.678574 | 6.483234  | 0.496690  |
| 71 | 6 | 0 | -4.151536 | 5.564941  | 0.256675  | 91  | 1 | 0 | -4.506987 | 4.645334  | 2.181979  |
| 72 | 6 | 0 | -4.053663 | 4.539514  | 1.198033  | 92  | 1 | 0 | -4.406943 | 1.083870  | 2.085481  |
| 73 | 7 | 0 | -3.415249 | 3.386872  | 0.968783  | 93  | 1 | 0 | -5.867334 | 0.839184  | 4.070188  |
| 74 | 6 | 0 | -4.503869 | 0.117714  | 2.575417  | 94  | 1 | 0 | -6.044174 | -1.356531 | 5.231087  |
| 75 | 6 | 0 | -5.313986 | -0.019942 | 3.700759  | 95  | 1 | 0 | -4.755654 | -3.305871 | 4.375513  |
| 76 | 6 | 0 | -5.412211 | -1.251147 | 4.353615  | 96  | 1 | 0 | -3.337124 | -3.075823 | 2.375986  |
| 77 | 6 | 0 | -4.690202 | -2.343986 | 3.874279  | 97  | 1 | 0 | -0.693865 | -3.179140 | -3.737721 |
| 78 | 6 | 0 | -3.880182 | -2.210743 | 2.744690  | 98  | 1 | 0 | -1.330111 | -4.150251 | -1.774989 |
| 79 | 8 | 0 | -0.550519 | -1.811437 | -1.767420 | 99  | 1 | 0 | -5.047530 | -2.418195 | 0.463840  |
| 80 | 8 | 0 | -1.024803 | -2.313937 | -4.046004 | 100 | 1 | 0 | -7.140459 | -3.257047 | -0.459037 |
| 81 | 8 | 0 | -0.402349 | -4.114189 | -2.088359 | 101 | 1 | 0 | -8.266826 | -2.059731 | -2.329868 |
| 82 | 6 | 0 | -4.920331 | -0.695076 | -0.839832 | 102 | 1 | 0 | -7.230971 | 0.011120  | -3.254721 |
| 83 | 6 | 0 | -5.511070 | -1.865705 | -0.337947 | 103 | 1 | 0 | -5.110365 | 0.861975  | -2.303418 |
| 84 | 6 | 0 | -6.705846 | -2.349266 | -0.868830 |     |   |   |           |           |           |
| 85 | 6 | 0 | -7.336166 | -1.679466 | -1.916405 |     |   |   |           |           |           |

-----  
The total electronic energy was calculated to be -3543.7276623 Hartree.

**Table S9.** Optimized structure of  $3\cdot\text{H}_2\text{O}$  (B3LYP-D3/6-31G(d))

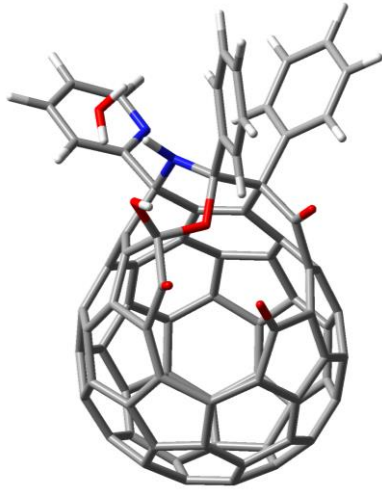

|    |   |   |           |           |           |
|----|---|---|-----------|-----------|-----------|
| 19 | 6 | 0 | 2.150824  | -2.801442 | 2.408336  |
| 20 | 6 | 0 | -0.449695 | -0.177149 | 2.489219  |
| 21 | 6 | 0 | -0.163449 | 2.254058  | 1.057030  |
| 22 | 6 | 0 | 5.342334  | -0.281470 | 1.835965  |
| 23 | 6 | 0 | 5.613776  | 1.028092  | -0.241405 |
| 24 | 6 | 0 | 0.074779  | 2.477495  | -1.411905 |
| 25 | 6 | 0 | 4.923168  | 2.044309  | -1.018022 |
| 26 | 6 | 0 | 2.801094  | 3.306444  | -0.954527 |
| 27 | 6 | 0 | 5.585863  | -0.209159 | -1.002594 |
| 28 | 6 | 0 | 4.502657  | 1.446474  | -2.268209 |
| 29 | 6 | 0 | 2.435722  | 2.786302  | -2.185207 |
| 30 | 6 | 0 | 0.017156  | -1.561634 | 2.529138  |
| 31 | 6 | 0 | 5.326028  | -1.472843 | 1.100582  |
| 32 | 6 | 0 | -1.294974 | 1.386533  | 0.822339  |
| 33 | 6 | 0 | 4.871913  | 0.039517  | -2.239715 |
| 34 | 6 | 0 | 3.302259  | 1.827827  | -2.855888 |
| 35 | 6 | 0 | 1.064313  | 2.402185  | -2.408656 |
| 36 | 6 | 0 | 1.088886  | 1.252598  | -3.271839 |
| 37 | 6 | 0 | -1.107576 | 1.637691  | -1.542934 |
| 38 | 6 | 0 | -1.443595 | 0.197002  | 1.498961  |
| 39 | 6 | 0 | -1.951948 | -2.249503 | 1.146354  |
| 40 | 6 | 0 | 2.440255  | 0.833966  | -3.459311 |
| 41 | 6 | 0 | 2.730199  | -0.529667 | -3.329937 |
| 42 | 6 | 0 | 1.707450  | -1.535361 | -3.079134 |
| 43 | 6 | 0 | 3.977255  | -0.917646 | -2.725609 |
| 44 | 6 | 0 | 4.397086  | -2.526034 | 1.452769  |
| 45 | 6 | 0 | -1.930044 | -0.680904 | -2.428381 |
| 46 | 6 | 0 | 5.427193  | -1.429421 | -0.351223 |
| 47 | 6 | 0 | 4.519885  | -2.427961 | -0.891089 |
| 48 | 6 | 0 | -1.107944 | 0.592321  | -2.444307 |
| 49 | 6 | 0 | -0.517449 | -2.428557 | 1.505403  |
| 50 | 6 | 0 | 0.351593  | -3.257605 | 0.805737  |
| 51 | 6 | 0 | 0.096692  | 0.300412  | -3.170666 |
| 52 | 6 | 0 | 0.378833  | -1.119699 | -3.201242 |
| 53 | 6 | 0 | 3.758124  | -2.162031 | -2.033159 |
| 54 | 6 | 0 | 2.354305  | -2.566476 | -2.174107 |
| 55 | 6 | 0 | -0.985107 | -1.716243 | -3.154076 |
| 56 | 6 | 0 | 3.909261  | -3.112570 | 0.211838  |
| 57 | 6 | 0 | 1.701296  | -3.383367 | 1.229275  |
| 58 | 6 | 0 | 0.343115  | -3.497278 | -0.696813 |
| 59 | 6 | 0 | 2.583993  | -3.498144 | 0.083639  |
| 60 | 6 | 0 | 1.804347  | -3.298472 | -1.117091 |
| 61 | 6 | 0 | -2.135987 | 1.725095  | -0.394081 |

-----  
Standard orientation:  
-----

| Center Number | Atomic Number | Atomic Type | Coordinates (Angstroms) |           |           |
|---------------|---------------|-------------|-------------------------|-----------|-----------|
|               |               |             | X                       | Y         | Z         |
| 1             | 6             | 0           | 3.919879                | 2.904680  | 1.063298  |
| 2             | 6             | 0           | 2.524521                | 3.186070  | 1.355306  |
| 3             | 6             | 0           | 1.901957                | 2.528915  | 2.403938  |
| 4             | 6             | 0           | 2.630486                | 1.570319  | 3.212951  |
| 5             | 6             | 0           | 3.963303                | 1.278832  | 2.921104  |
| 6             | 6             | 0           | 4.618930                | 1.957005  | 1.816233  |
| 7             | 6             | 0           | 1.810083                | 3.383937  | 0.107913  |
| 8             | 6             | 0           | 0.551646                | 2.058717  | 2.239428  |
| 9             | 6             | 0           | 1.705160                | 0.510677  | 3.547979  |
| 10            | 6             | 0           | 4.419541                | -0.100517 | 2.942685  |
| 11            | 6             | 0           | 5.476231                | 0.992813  | 1.147899  |
| 12            | 6             | 0           | 4.085171                | 2.963886  | -0.373620 |
| 13            | 6             | 0           | 3.527180                | -1.121186 | 3.281346  |
| 14            | 6             | 0           | 2.144486                | -0.805591 | 3.596838  |
| 15            | 6             | 0           | 3.526139                | -2.360505 | 2.529791  |
| 16            | 6             | 0           | 1.293607                | -1.837980 | 3.054020  |
| 17            | 6             | 0           | 0.488698                | 2.918752  | -0.072595 |
| 18            | 6             | 0           | 0.416003                | 0.813829  | 2.960200  |

|    |   |   |           |           |           |     |   |   |           |           |           |
|----|---|---|-----------|-----------|-----------|-----|---|---|-----------|-----------|-----------|
| 62 | 6 | 0 | -2.548940 | -0.813605 | 1.178135  | 86  | 6 | 0 | -6.943469 | -2.445294 | -1.130077 |
| 63 | 6 | 0 | -3.126703 | -0.560683 | -0.285214 | 87  | 1 | 0 | -3.006040 | 3.369650  | -2.418722 |
| 64 | 7 | 0 | -3.271090 | 0.833118  | -0.503467 | 88  | 1 | 0 | -4.112353 | 5.599508  | -2.173644 |
| 65 | 6 | 0 | -3.667567 | -0.661659 | 2.235062  | 89  | 1 | 0 | -4.438188 | 6.530746  | 0.142436  |
| 66 | 6 | 0 | -2.742936 | 3.136245  | -0.288628 | 90  | 1 | 0 | -3.656257 | 5.170805  | 2.088250  |
| 67 | 8 | 0 | -2.624153 | -3.229491 | 0.887870  | 91  | 1 | 0 | -3.486021 | 1.496825  | 2.298928  |
| 68 | 8 | 0 | -3.111487 | -0.590196 | -3.179096 | 92  | 1 | 0 | -5.326410 | 1.823719  | 3.878407  |
| 69 | 6 | 0 | -3.153073 | 3.813365  | -1.440214 | 93  | 1 | 0 | -6.606017 | -0.130766 | 4.751854  |
| 70 | 6 | 0 | -3.776729 | 5.051169  | -1.298021 | 94  | 1 | 0 | -5.994141 | -2.423411 | 3.994145  |
| 71 | 6 | 0 | -3.962462 | 5.567779  | -0.016195 | 95  | 1 | 0 | -4.172509 | -2.755685 | 2.385623  |
| 72 | 6 | 0 | -3.524736 | 4.808980  | 1.070096  | 96  | 1 | 0 | -5.774822 | -4.060526 | -1.954355 |
| 73 | 7 | 0 | -2.930243 | 3.617247  | 0.945897  | 97  | 1 | 0 | -3.599038 | -3.003074 | -1.438079 |
| 74 | 6 | 0 | -4.017259 | 0.627613  | 2.669180  | 98  | 1 | 0 | -5.633329 | 0.343179  | 0.314350  |
| 75 | 6 | 0 | -5.070574 | 0.815191  | 3.563897  | 99  | 1 | 0 | -7.816760 | -0.700344 | -0.205631 |
| 76 | 6 | 0 | -5.787510 | -0.277702 | 4.051982  | 100 | 1 | 0 | -7.899909 | -2.908848 | -1.356823 |
| 77 | 6 | 0 | -5.442680 | -1.560867 | 3.629424  | 101 | 8 | 0 | -2.094269 | -1.187041 | -1.129175 |
| 78 | 6 | 0 | -4.396466 | -1.753550 | 2.726042  | 102 | 1 | 0 | -3.911302 | 1.087201  | -1.258910 |
| 79 | 8 | 0 | -0.595410 | -3.734491 | -1.418052 | 103 | 1 | 0 | -3.305017 | -1.502288 | -3.476511 |
| 80 | 8 | 0 | -1.438456 | -2.652187 | -3.770803 | 104 | 8 | 0 | -5.101402 | 1.342094  | -2.757149 |
| 81 | 6 | 0 | -5.751619 | -3.089656 | -1.466870 | 105 | 1 | 0 | -4.504840 | 0.681456  | -3.159498 |
| 82 | 6 | 0 | -4.521697 | -2.496300 | -1.182082 | 106 | 1 | 0 | -5.796792 | 0.797166  | -2.352770 |
| 83 | 6 | 0 | -4.469155 | -1.245544 | -0.556229 |     |   |   |           |           |           |
| 84 | 6 | 0 | -5.667527 | -0.610467 | -0.200428 |     |   |   |           |           |           |
| 85 | 6 | 0 | -6.897390 | -1.204917 | -0.490834 |     |   |   |           |           |           |

The total electronic energy was calculated to be -3620.1770762 Hartree.

**Table S10.** Optimized structure of **3** (B3LYP-D3/6-31G(d))

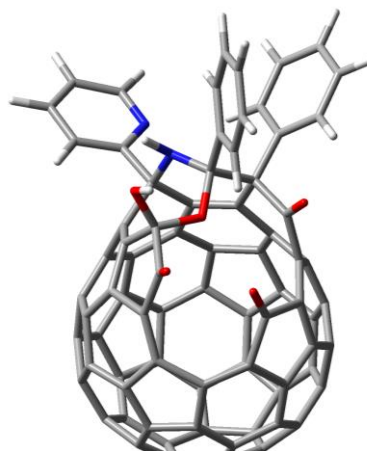

|    |   |   |           |           |           |
|----|---|---|-----------|-----------|-----------|
| 17 | 6 | 0 | -0.461602 | 2.925786  | 0.290870  |
| 18 | 6 | 0 | -0.227006 | 1.016376  | -2.861766 |
| 19 | 6 | 0 | -1.902672 | -2.658699 | -2.601585 |
| 20 | 6 | 0 | 0.642021  | 0.014825  | -2.420498 |
| 21 | 6 | 0 | 0.250458  | 2.344908  | -0.850162 |
| 22 | 6 | 0 | -5.167612 | -0.243344 | -2.000293 |
| 23 | 6 | 0 | -5.546354 | 0.928243  | 0.141581  |
| 24 | 6 | 0 | -0.092174 | 2.410182  | 1.615386  |
| 25 | 6 | 0 | -4.909596 | 1.907765  | 1.005841  |
| 26 | 6 | 0 | -2.814656 | 3.212149  | 1.103579  |
| 27 | 6 | 0 | -5.519693 | -0.353418 | 0.826006  |
| 28 | 6 | 0 | -4.524358 | 1.241298  | 2.232673  |
| 29 | 6 | 0 | -2.486144 | 2.623252  | 2.313253  |
| 30 | 6 | 0 | 0.205929  | -1.373099 | -2.564194 |
| 31 | 6 | 0 | -5.152261 | -1.477588 | -1.339248 |
| 32 | 6 | 0 | 1.391636  | 1.484651  | -0.626211 |
| 33 | 6 | 0 | -4.858726 | -0.168278 | 2.102762  |
| 34 | 6 | 0 | -3.356831 | 1.608963  | 2.890694  |
| 35 | 6 | 0 | -1.116575 | 2.253464  | 2.566801  |
| 36 | 6 | 0 | -1.149696 | 1.053434  | 3.357941  |
| 37 | 6 | 0 | 1.098910  | 1.584284  | 1.740987  |
| 38 | 6 | 0 | 1.590761  | 0.344072  | -1.371743 |
| 39 | 6 | 0 | 2.134851  | -2.111926 | -1.157301 |
| 40 | 6 | 0 | -2.497111 | 0.597133  | 3.466905  |
| 41 | 6 | 0 | -2.747585 | -0.761941 | 3.240804  |
| 42 | 6 | 0 | -1.691951 | -1.730802 | 2.971384  |
| 43 | 6 | 0 | -3.961390 | -1.135809 | 2.564097  |
| 44 | 6 | 0 | -4.187844 | -2.488074 | -1.719019 |
| 45 | 6 | 0 | 1.944317  | -0.756610 | 2.513659  |
| 46 | 6 | 0 | -5.308612 | -1.526769 | 0.107346  |
| 47 | 6 | 0 | -4.400552 | -2.538678 | 0.620098  |
| 48 | 6 | 0 | 1.082154  | 0.485610  | 2.572950  |
| 49 | 6 | 0 | 0.719057  | -2.292033 | -1.576441 |
| 50 | 6 | 0 | -0.156031 | -3.179107 | -0.961669 |
| 51 | 6 | 0 | -0.135297 | 0.127630  | 3.239823  |
| 52 | 6 | 0 | -0.377982 | -1.298265 | 3.176023  |
| 53 | 6 | 0 | -3.688134 | -2.329759 | 1.805465  |
| 54 | 6 | 0 | -2.281824 | -2.714895 | 1.976989  |
| 55 | 6 | 0 | 1.010273  | -1.858363 | 3.147346  |

Standard orientation:

| Center Number | Atomic Number | Atomic Type | Coordinates (Angstroms) |           |           |
|---------------|---------------|-------------|-------------------------|-----------|-----------|
|               |               |             | X                       | Y         | Z         |
| 1             | 6             | 0           | -3.846539               | 2.915768  | -0.977684 |
| 2             | 6             | 0           | -2.447179               | 3.240967  | -1.196288 |
| 3             | 6             | 0           | -1.770202               | 2.663127  | -2.257489 |
| 4             | 6             | 0           | -2.446646               | 1.743911  | -3.153079 |
| 5             | 6             | 0           | -3.783226               | 1.408673  | -2.932458 |
| 6             | 6             | 0           | -4.495119               | 2.003233  | -1.814331 |
| 7             | 6             | 0           | -1.785422               | 3.374957  | 0.087789  |
| 8             | 6             | 0           | -0.416646               | 2.209488  | -2.069471 |
| 9             | 6             | 0           | -1.486712               | 0.725542  | -3.516976 |
| 10            | 6             | 0           | -4.208058               | 0.024752  | -3.057119 |
| 11            | 6             | 0           | -5.355240               | 0.982395  | -1.240640 |
| 12            | 6             | 0           | -4.067829               | 2.881880  | 0.452519  |
| 13            | 6             | 0           | -3.281569               | -0.955073 | -3.423370 |
| 14            | 6             | 0           | -1.895133               | -0.593205 | -3.665171 |
| 15            | 6             | 0           | -3.281396               | -2.238227 | -2.749304 |
| 16            | 6             | 0           | -1.043124               | -1.640942 | -3.154148 |

|    |   |   |           |           |           |     |   |   |          |           |           |
|----|---|---|-----------|-----------|-----------|-----|---|---|----------|-----------|-----------|
| 56 | 6 | 0 | -3.734659 | -3.141532 | -0.498188 | 81  | 6 | 0 | 5.785462 | -3.118968 | 1.523763  |
| 57 | 6 | 0 | -1.485500 | -3.303694 | -1.443446 | 82  | 6 | 0 | 4.566440 | -2.499495 | 1.252480  |
| 58 | 6 | 0 | -0.196990 | -3.512943 | 0.522877  | 83  | 6 | 0 | 4.536760 | -1.206784 | 0.712787  |
| 59 | 6 | 0 | -2.407005 | -3.507632 | -0.341875 | 84  | 6 | 0 | 5.744220 | -0.552623 | 0.440142  |
| 60 | 6 | 0 | -1.677191 | -3.368274 | 0.898514  | 85  | 6 | 0 | 6.962569 | -1.177870 | 0.709426  |
| 61 | 6 | 0 | 2.171687  | 1.758317  | 0.648004  | 86  | 6 | 0 | 6.987960 | -2.461183 | 1.255012  |
| 62 | 6 | 0 | 2.703177  | -0.664996 | -1.071464 | 87  | 1 | 0 | 2.647952 | 3.423966  | 2.797414  |
| 63 | 6 | 0 | 3.202711  | -0.512327 | 0.429479  | 88  | 1 | 0 | 3.754666 | 5.669465  | 2.736661  |
| 64 | 7 | 0 | 3.327955  | 0.877502  | 0.748125  | 89  | 1 | 0 | 4.430215 | 6.614206  | 0.504391  |
| 65 | 6 | 0 | 3.859089  | -0.427045 | -2.072273 | 90  | 1 | 0 | 3.978369 | 5.255693  | -1.544304 |
| 66 | 6 | 0 | 2.754724  | 3.183357  | 0.654739  | 91  | 1 | 0 | 3.657662 | 1.728940  | -1.985724 |
| 67 | 8 | 0 | 2.816968  | -3.095492 | -0.944933 | 92  | 1 | 0 | 5.535548 | 2.184130  | -3.485775 |
| 68 | 8 | 0 | 3.109672  | -0.615273 | 3.261227  | 93  | 1 | 0 | 6.862799 | 0.309106  | -4.457197 |
| 69 | 6 | 0 | 2.964058  | 3.864159  | 1.856921  | 94  | 1 | 0 | 6.259631 | -2.037160 | -3.876341 |
| 70 | 6 | 0 | 3.578079  | 5.115904  | 1.818612  | 95  | 1 | 0 | 4.397246 | -2.499834 | -2.351132 |
| 71 | 6 | 0 | 3.954392  | 5.641711  | 0.584323  | 96  | 1 | 0 | 5.792318 | -4.121767 | 1.942312  |
| 72 | 6 | 0 | 3.701338  | 4.882430  | -0.560094 | 97  | 1 | 0 | 3.635722 | -3.019823 | 1.446349  |
| 73 | 7 | 0 | 3.118418  | 3.680234  | -0.534167 | 98  | 1 | 0 | 5.728413 | 0.439738  | 0.003800  |
| 74 | 6 | 0 | 4.206026  | 0.892806  | -2.403651 | 99  | 1 | 0 | 7.890977 | -0.657821 | 0.488842  |
| 75 | 6 | 0 | 5.282363  | 1.153277  | -3.251354 | 100 | 1 | 0 | 7.936671 | -2.947485 | 1.466795  |
| 76 | 6 | 0 | 6.026345  | 0.105044  | -3.793788 | 101 | 8 | 0 | 2.139619 | -1.181534 | 1.179336  |
| 77 | 6 | 0 | 5.686246  | -1.207840 | -3.470732 | 102 | 1 | 0 | 3.828308 | 1.006169  | 1.622288  |
| 78 | 6 | 0 | 4.616512  | -1.474065 | -2.614820 | 103 | 1 | 0 | 3.431221 | -1.519034 | 3.446283  |
| 79 | 8 | 0 | 0.718687  | -3.779053 | 1.262544  |     |   |   |          |           |           |
| 80 | 8 | 0 | 1.456858  | -2.825392 | 3.715799  |     |   |   |          |           |           |

-----  
The total electronic energy was calculated to be -3543.7415901 Hartree.

## 6. Possible Formation Mechanism of 4

Since **3** has an electron-rich amine moiety, the single electron transfer (SET) between two molecules of **3** would occur to provide  $3^{3+}$  and  $3^{3-}$ . The former one produces  $H^+$  and **INT1 $\cdot$**  which is further converted into **1** and  $OH\cdot$ . Therefore,  $3^{3+}$  works as a source of  $H^+$  and  $OH\cdot$ . Note that regenerated **1** could be transformed again into **3** or **2** by the reaction with water. The dehydration from radical anion  $3^{3-}$  affords ketyl radical **1 $\cdot$**  which is also formed via SET between **3** and **1**. The intramolecular nucleophilic addition in **1 $\cdot$**  leads to the formation of **INT2 $\cdot$** . The subsequent protonation gives **INT3 $\cdot$**  which undergoes an H-abstraction from the solvent molecules (H-Sol) such as toluene to give **4** together with  $HO-Sol$  via a radical combination with  $OH\cdot$ . Importantly, a part of **INT2 $\cdot$**  and **INT3 $\cdot$**  could be converted into **2**. Therefore, at higher temperatures, **3** is consumed to generate both **2** and **4**, thus lowering the yield of **3** at 160 °C.

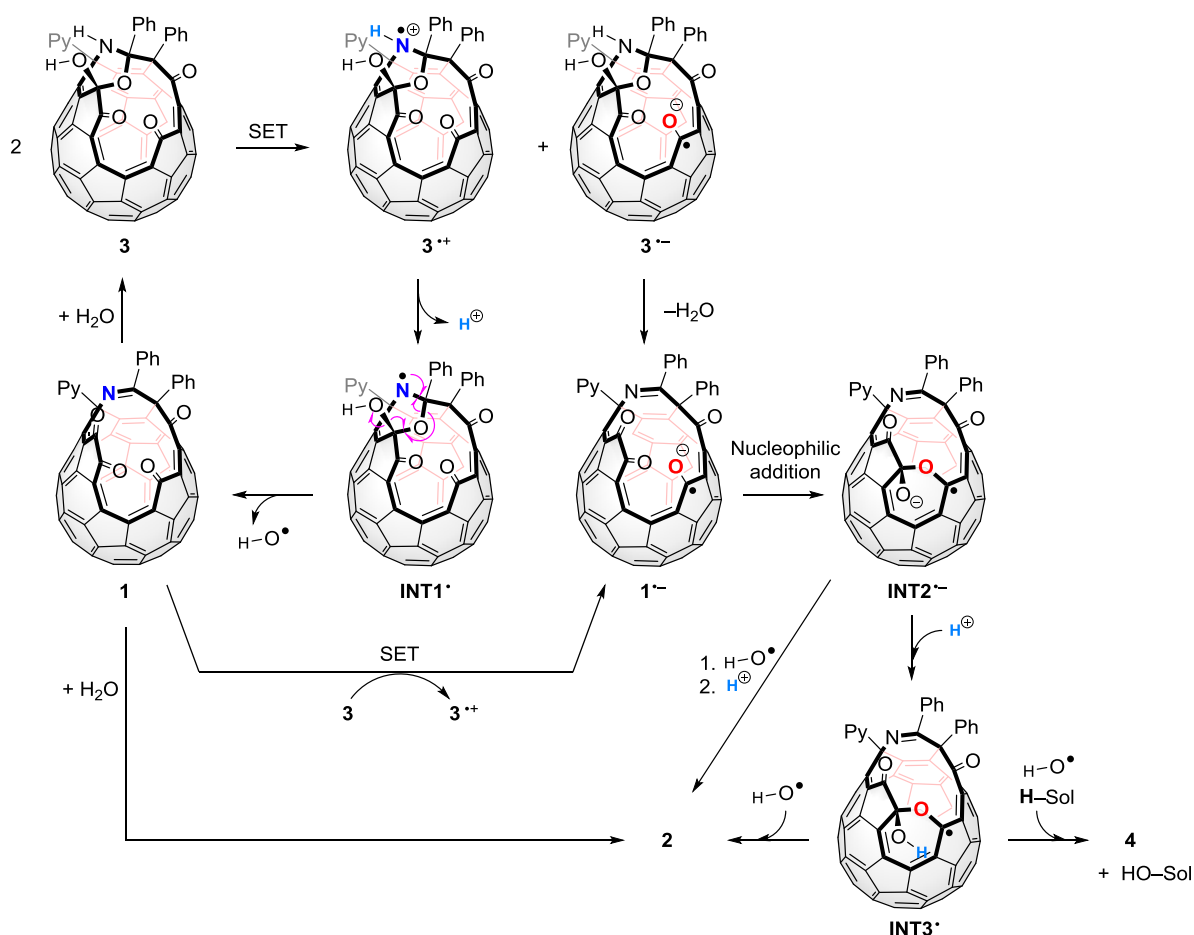

**Figure S16.** Possible formation mechanism of **4**. H-Sol denotes a solvent molecule such as toluene.

## 7. References

- (1) G. M. Sheldrick, *Acta Crystallogr. A* 2015, **71**, 3–8.
